# Supplementary material for: Detection of Selection Signatures on the X Chromosome in Three Sheep Breeds
Source: Int J Mol Sci. 2015 Aug 28;16(9):20360–74. doi: 10.3390/ijms160920360 (PMC4613208; doi:10.3390/ijms160920360)
Supplement: Supplementary file 1 [file ijms-16-20360-s001.xlsx]

## Sheet: Table S1
Table S1 German Mutton each SNP iHS value
SNP name	iHS value
OARX_84212352_X.1	5.85403
OARX_78504400.1	5.0785
OARX_26219241.1	4.80504
OARX_47429385.1	4.39093
OARX_10602383.1	3.66488
s45132.1	3.53438
OARX_112825323.1	3.48894
OARX_124895181.1	3.34051
OARX_128881696.1	3.31903
OARX_38801624.1	3.28278
OARX_74923472.1	3.24966
OARX_85734914.1	3.24963
OARX_78584539.1	3.16256
OARX_82319638.1	3.04113
OARX_125057668.1	3.03854
OARX_125044988.1	3.03854
OARX_125031440.1	3.03854
OARX_38965990.1	2.97967
s52126.1	2.8284
OARX_37969851.1	2.82425
OARX_17042330.1	2.82396
OARX_11703218.1	2.81439
OARX_114161048.1	2.75696
OARX_29911993.1	2.75459
s62101.1	2.75312
OARX_39001399.1	2.71618
OARX_38939916.1	2.71585
s60331.1	2.71583
s48537.1	2.5164
OARX_120409273.1	2.49989
OARX_110184293_X.1	2.48017
OARX_11260093.1	2.47787
OARX_47556312.1	2.42015
OARX_10672687.1	2.40793
OARX_43149441.1	2.40185
OARX_87110835.1	2.39035
OARX_118887238.1	2.37882
OARX_117790873.1	2.35638
s45030.1	2.35365
OARX_122522511.1	2.348
s75715.1	2.2309
OARX_72822977.1	2.15299
s10517.1	2.14511
OARX_11175000.1	2.12832
OARX_122571365.1	2.09292
OARX_73686229.1	2.05104
OARX_34005901.1	2.0501
OARX_43066335.1	2.04035
OARX_101276703.1	2.03258
OARX_40368091.1	2.01335
OARX_11668696.1	2.01049
OARX_11127459.1	1.9945
OARX_42401514.1	1.99248
OARX_94549447.1	1.95653
OARX_27398107.1	1.94062
OARX_17003361.1	1.93483
OARX_25431652.1	1.90733
s56175.1	1.89391
s12053.1	1.88492
s41053.1	1.88492
s69303.1	1.84916
OARX_103197673.1	1.83879
OARX_25892929.1	1.76735
OARX_119825699_X.1	1.74641
OARX_48771740.1	1.70981
s11286.1	1.70129
s26116.1	1.6995
OARX_102654502.1	1.69654
s74345.1	1.66457
OARX_103559964.1	1.66457
OARX_103609228.1	1.66457
OARX_121809968.1	1.66295
OARX_31599682.1	1.65161
s23827.1	1.64975
s26335.1	1.63423
OARX_8997102_X.1	1.62644
OARX_25296412.1	1.61514
OARX_82755160.1	1.58158
OARX_87324041.1	1.5793
s44214.1	1.54454
OARX_80520919.1	1.50641
OARX_16106124.1	1.4869
OARX_46703391.1	1.44216
OARX_20950879_X.1	1.43504
OARX_85534087.1	1.42878
s12092.1	1.42178
OARX_42676383.1	1.41612
OARX_101475197.1	1.41132
OARX_27289624.1	1.40896
OARX_78903642.1	1.4
OARX_18218115.1	1.39613
OARX_40013563.1	1.39004
OARX_121598412.1	1.38941
s24321.1	1.38443
OARX_22407231.1	1.37072
s46983.1	1.34662
OARX_114100188.1	1.33688
OARX_27316457_X.1	1.33533
OARX_124785484.1	1.33127
OARX_81017616.1	1.33116
OARX_87273449.1	1.32607
OARX_114576371.1	1.32213
OARX_79350656.1	1.30862
OARX_42827832.1	1.30763
OARX_121157013.1	1.30489
OARX_39570821_X.1	1.28746
OARX_78380875.1	1.26153
OARX_121716434.1	1.25988
s68313.1	1.25939
OARX_10802557.1	1.25762
s26041.1	1.25632
OARX_31607255.1	1.24764
s42190.1	1.23863
OARX_25153821.1	1.23409
OARX_88051650.1	1.22806
OARX_82566242.1	1.22639
OARX_15558300.1	1.22407
OARX_120562732.1	1.22327
OARX_84431875.1	1.21829
s30196.1	1.21319
OARX_108555568.1	1.20662
OARX_26091319.1	1.20646
OARX_112805650.1	1.20039
OARX_108414989.1	1.19952
OARX_88665373.1	1.19381
OARX_122134724.1	1.18574
OARX_123880994.1	1.16566
s55516.1	1.16566
OARX_38363560.1	1.16037
OARX_28612369.1	1.15746
OARX_53985636.1	1.15597
s61888.1	1.14341
OARX_30491298_X.1	1.13995
OARX_39901562.1	1.13464
OARX_63240964.1	1.13417
OARX_22199486.1	1.1329
s56097.1	1.13021
s15257.1	1.12082
OARX_14382090.1	1.11708
OARX_88140694.1	1.11703
OARX_90906078.1	1.10384
s14505.1	1.07915
OARX_86740281.1	1.07733
OARX_43377931.1	1.07236
OARX_61737376.1	1.06721
OARX_61745327.1	1.06721
s11996.1	1.06481
OARX_8338946.1	1.06442
OARX_110420444_X.1	1.06153
OARX_107840506.1	1.05836
s36628.1	1.05416
s05550.1	1.05341
s75871.1	1.0531
OARX_101512543.1	1.05074
DU450886_629.1	1.05048
OARX_29948603.1	1.04908
OARX_29249212.1	1.04801
s10893.1	1.04149
OARX_95550695.1	1.03511
s62013.1	1.0347
OARX_7998478.1	1.03454
OARX_78028955.1	1.02941
OARX_30456682.1	1.02784
OARX_67423871.1	1.02491
s71305.1	1.02124
OARX_91172883.1	1.01562
OARX_22620616.1	1.01345
OARX_76192158.1	1.01037
OARX_121608149.1	1.01003
s56930.1	1.00994
OARX_113078192.1	1.00971
OARX_83698455.1	1.009
s06965.1	1.00454
OARX_78089621.1	1.00149
OARX_111462941.1	0.991637
OARX_48653254.1	0.985772
OARX_39956656.1	0.981952
OARX_51960372.1	0.979392
OARX_82373498.1	0.974052
s32336.1	0.970661
OARX_108427445.1	0.949707
OARX_108475651.1	0.949707
s34020.1	0.949707
OARX_120893024.1	0.942939
OARX_25197033.1	0.940279
OARX_116055833.1	0.935951
OARX_31838440.1	0.93483
OARX_125130516.1	0.934291
OARX_52608221.1	0.931534
OARX_105936332.1	0.926455
250506CS3900539000001_471.1	0.922375
OARX_39345333.1	0.921869
s40873.1	0.917629
OARX_15446991.1	0.915831
s72924.1	0.908948
OARX_125711423_X.1	0.90893
OARX_81713091.1	0.907312
s64579.1	0.902836
OARX_43295474.1	0.892156
OARX_10965528.1	0.889497
OARX_59571364.1	0.887007
s39837.1	0.886317
OARX_28682429.1	0.886317
s23119.1	0.881887
s67468.1	0.881243
OARX_40933614.1	0.878895
OARX_25770728.1	0.872092
OARX_116720248.1	0.869357
OARX_23896670.1	0.866737
s46003.1	0.866295
OARX_88410255.1	0.863694
OARX_78152672.1	0.862535
DU364592_286.1	0.860992
OARX_109082678_X.1	0.860592
OARX_64137688.1	0.860467
OARX_37504418.1	0.857877
OARX_46956289.1	0.857528
OARX_15615564.1	0.855182
OARX_109200876.1	0.853869
s59791.1	0.853676
OARX_60264325.1	0.851115
s38079.1	0.851115
s21669.1	0.844984
s27905.1	0.842335
s59443.1	0.839503
OARX_120706037.1	0.833218
OARX_119492809.1	0.830991
OARX_28842785.1	0.829823
s33439.1	0.829096
OARX_113035178.1	0.827025
OARX_105905765.1	0.824928
OARX_40992335.1	0.821944
DU179310_361.1	0.817537
OARX_14214233.1	0.806498
OARX_115157818.1	0.802294
s39817.1	0.799845
OARX_81899362.1	0.799002
OARX_112600953.1	0.797432
OARX_8907381.1	0.796566
OARX_76432979.1	0.794488
s38753.1	0.793018
OARX_97818989.1	0.790386
OARX_107058174.1	0.790043
OARX_124733388.1	0.789593
OARX_9037102.1	0.788584
OARX_110594072.1	0.785138
OARX_38431131.1	0.783068
OARX_78982967.1	0.779346
DU240765_244.1	0.777455
OARX_129007775.1	0.773053
OARX_104101047.1	0.767504
s34323.1	0.760133
s06926.1	0.748315
s66286.1	0.748211
OARX_53703822.1	0.743728
OARX_81029058.1	0.74223
s19301.1	0.737595
OARX_11088122.1	0.735506
OARX_10840799.1	0.730027
OARX_111190102.1	0.728052
OARX_63233390_X.1	0.72725
OARX_108965768.1	0.726059
OARX_122403019.1	0.725766
OARX_79293639.1	0.725632
OARX_121652169.1	0.723613
OARX_103524806.1	0.722533
s31031.1	0.722446
s07963.1	0.7223
OARX_91589178.1	0.722213
OARX_25777974.1	0.72143
OARX_106445652.1	0.719546
OARX_78232119.1	0.718863
s44247.1	0.715726
s45125.1	0.714238
OARX_46542447.1	0.714145
OARX_113274860.1	0.706043
OARX_114953976.1	0.705026
OARX_76572936.1	0.69966
OAR23_48530053.1	0.698702
OARX_87619694.1	0.696102
OARX_48392113.1	0.693968
OARX_112464882.1	0.693752
OARX_112416866.1	0.693752
OARX_8267269.1	0.692374
OARX_107723746.1	0.690232
OARX_55032299.1	0.687587
OARX_50921852.1	0.686495
s27938.1	0.683772
s50909.1	0.681122
OARX_26036045.1	0.678619
OARX_110869172.1	0.677188
OARX_118724712.1	0.675739
OARX_75087090.1	0.671402
s47072.1	0.671223
OARX_77428384.1	0.669868
s49888.1	0.66471
OARX_103999250.1	0.661221
OARX_15658171.1	0.660665
OARX_21374798.1	0.658824
OARX_19643590.1	0.651689
OARX_38201398.1	0.650227
s45757.1	0.650066
s17286.1	0.648738
OARX_73769365.1	0.648688
s61601.1	0.648047
OARX_95372410.1	0.647819
s34732.1	0.647819
s35782.1	0.645157
s48622.1	0.639434
s11827.1	0.63819
OARX_121724022.1	0.637759
OARX_78631468.1	0.635156
s29254.1	0.634428
s54349.1	0.633742
OARX_28862933.1	0.632594
OARX_110234399.1	0.631876
OARX_102676774.1	0.631795
s26005.1	0.630449
OARX_47386142_X.1	0.629728
OARX_109443858.1	0.625632
s17468.1	0.623785
s17709.1	0.623616
OARX_115405200.1	0.623119
s43972.1	0.617581
DU498640_321.1	0.612908
s61050.1	0.610553
s73460.1	0.605733
OARX_8203085.1	0.605699
OARX_72263548.1	0.597483
s40789.1	0.59575
OARX_76459539.1	0.595362
s50055.1	0.592701
OARX_83911613.1	0.592616
s29524.1	0.587778
OARX_82418640.1	0.587237
s59821.1	0.58656
OARX_78616287.1	0.585012
OARX_14669588.1	0.584678
OARX_92007136.1	0.581091
OARX_81857193.1	0.58043
OARX_53932317.1	0.58015
OARX_46551013.1	0.576253
DU487488_662.1	0.575139
OARX_73629464.1	0.574535
s29953.1	0.574146
OARX_46097533.1	0.573779
OARX_121995198.1	0.570854
s64486.1	0.568694
s17715.1	0.568273
OARX_107941501.1	0.565216
OAR2_207144869.1	0.564844
OARX_23062957.1	0.56384
s23511.1	0.563548
OARX_40911514.1	0.561034
OARX_27576676.1	0.559521
s71112.1	0.557747
s37526.1	0.556353
OARX_102098117.1	0.554662
OARX_121272018.1	0.554642
OARX_121352349_X.1	0.554642
OARX_113174546.1	0.554193
OARX_28886935.1	0.55353
OARX_129095549.1	0.552778
OARX_11233802.1	0.548628
s42548.1	0.547617
OARX_81758554.1	0.547306
OARX_35208552.1	0.543422
OARX_65030113.1	0.541138
s05978.1	0.539837
OARX_57792792.1	0.539794
OARX_15353072.1	0.539539
OARX_42467421.1	0.539243
OARX_117671978.1	0.538865
OARX_119953271.1	0.538356
s26403.1	0.53568
OARX_53695729.1	0.534159
OARX_114431127.1	0.533713
OARX_109922971.1	0.529212
OARX_46491130.1	0.527746
OARX_99054085_X.1	0.525956
OARX_124453154.1	0.523176
s06458.1	0.522995
OARX_54412853.1	0.522374
OARX_72351736.1	0.521223
s30825.1	0.516548
OARX_75548381.1	0.515103
s33410.1	0.514501
OARX_84338138.1	0.514322
OARX_123769039.1	0.513089
s57247.1	0.511729
OARX_124978161.1	0.511136
s18271.1	0.510364
OARX_16921240.1	0.509176
s21331.1	0.50831
OARX_33804882.1	0.507453
OARX_84110445.1	0.505629
s01718.1	0.501059
OARX_91430115.1	0.499913
s50831.1	0.498924
OARX_121227759.1	0.498338
OARX_64878398.1	0.497516
OARX_114537909_X.1	0.497502
s71214.1	0.496379
OARX_74459953.1	0.495741
s70954.1	0.492543
s19711.1	0.492118
OARX_109545230.1	0.490244
OARX_107023858.1	0.487683
OARX_58424602.1	0.486507
s50040.1	0.486162
OARX_123999513.1	0.484792
OARX_28932453.1	0.484739
s34139.1	0.484151
OARX_113525578.1	0.483368
s21099.1	0.482169
OARX_78740611.1	0.480187
OARX_49002889.1	0.478885
OARX_31437911.1	0.476645
DU199514_430.1	0.47623
OARX_119370187.1	0.474137
s20995.1	0.473331
OARX_48110587.1	0.471904
OARX_8657405_X.1	0.471596
OARX_113453324.1	0.471402
OARX_85664346.1	0.469042
OARX_111424482.1	0.467844
s38658.1	0.464981
OARX_16784151.1	0.464981
OARX_107236952.1	0.463058
s28984.1	0.462917
OARX_38777888.1	0.461443
OARX_22733191.1	0.460342
s71037.1	0.459432
OARX_10578530.1	0.458588
OARX_51976582.1	0.455437
OARX_125632426.1	0.452287
OARX_39212838.1	0.45125
OARX_121097572.1	0.449945
OARX_49045095.1	0.448069
s03197.1	0.447058
s75962.1	0.444362
OARX_11655327.1	0.442537
OARX_84464739.1	0.442057
OARX_119932740_X.1	0.441892
OARX_93917601.1	0.440695
s43107.1	0.440526
OARX_110496762.1	0.44048
OARX_102896730.1	0.439037
s74637.1	0.438193
OARX_28961716.1	0.437312
s18434.1	0.437282
s70693.1	0.436482
OARX_16041606.1	0.435089
s30041.1	0.434656
s36498.1	0.434375
OARX_29830880.1	0.433124
OARX_114322593.1	0.432788
OARX_114805072.1	0.429233
OARX_8095004.1	0.428587
s53196.1	0.428226
s21042.1	0.426772
OARX_27524192.1	0.426418
OARX_91745643.1	0.426246
OARX_113214394.1	0.426128
s71744.1	0.425964
OARX_97512438.1	0.425035
OARX_124109117.1	0.423863
OARX_25614788.1	0.421476
s61624.1	0.417275
OARX_56302763.1	0.415965
OARX_75975749.1	0.41525
OARX_11393124.1	0.412018
OARX_21677876.1	0.409812
OARX_47893170_X.1	0.409614
OARX_123908719.1	0.409269
OARX_22011518.1	0.409235
s70544.1	0.408127
OARX_31883742.1	0.40739
OARX_26418059.1	0.407156
OARX_125516668.1	0.405303
OARX_82679761.1	0.404447
OARX_83773452.1	0.40356
OARX_101330524.1	0.402443
s17025.1	0.402253
OARX_14005468.1	0.40073
s05401.1	0.399775
OARX_25473829.1	0.398169
s22678.1	0.397567
OARX_24888669.1	0.395944
OARX_102847527.1	0.394565
s42604.1	0.392218
OARX_103378386.1	0.392021
OARX_87598993.1	0.391181
OARX_49351860.1	0.389464
OARX_78197954.1	0.388731
OARX_48593293.1	0.388651
OARX_120191387.1	0.388084
OARX_102961116.1	0.38788
s21169.1	0.387108
s31310.1	0.386145
OARX_102920566.1	0.383258
OARX_51487346.1	0.381227
OARX_108932732.1	0.38049
OARX_119308133.1	0.376648
OARX_38176998.1	0.37368
OARX_74828607.1	0.373543
OARX_119235356.1	0.372192
OARX_16421483.1	0.370327
OARX_55773697.1	0.369199
OARX_111575175.1	0.368181
OARX_11161852.1	0.367647
OARX_19833738.1	0.366874
DU383316_402.1	0.365078
s26134.1	0.363619
s69605.1	0.3635
OARX_48063847.1	0.361294
OARX_65001221.1	0.358504
OARX_11591314.1	0.357213
OARX_78415093.1	0.35608
OARX_49585624.1	0.354385
OARX_115528761.1	0.354085
OARX_56195013.1	0.353571
OARX_26968286.1	0.352516
OARX_33986060.1	0.352488
DU428697_498.1	0.351635
s19302.1	0.351347
OARX_109487401.1	0.351001
s47245.1	0.350735
OARX_38618108.1	0.350469
OARX_14057975.1	0.348459
OARX_21851884.1	0.348335
OARX_21869827.1	0.348335
OARX_112854991_X.1	0.345566
s03694.1	0.345051
OARX_38346902.1	0.341529
s15738.1	0.340453
OARX_43335176.1	0.340341
OARX_77656772.1	0.332299
s61416.1	0.331633
OARX_115205577.1	0.330653
s41277.1	0.329869
OARX_120110524.1	0.329114
OARX_124970841.1	0.329098
s74614.1	0.328263
OARX_101587181.1	0.326728
OARX_106555138.1	0.326306
OARX_23489827.1	0.323786
OARX_107637867.1	0.319815
OARX_88646756.1	0.319669
OARX_25730959.1	0.319642
s39503.1	0.318606
OARX_29188769.1	0.31823
OARX_14876499.1	0.318217
s44107.1	0.317771
s49643.1	0.317029
OARX_26259689.1	0.313407
OARX_121406229.1	0.313188
OARX_49135019.1	0.311819
s49278.1	0.311225
OARX_98622500.1	0.311114
OARX_104184983.1	0.309584
s32144.1	0.309584
OARX_116493570.1	0.307775
OARX_78222056.1	0.305754
s22255.1	0.305724
s52811.1	0.304806
OARX_72985145.1	0.303727
OARX_73028561.1	0.303727
OARX_42837583.1	0.302297
OARX_27484186.1	0.301971
OARX_118061045.1	0.301512
OARX_18553357.1	0.300165
OARX_11486431.1	0.299756
s17903.1	0.299582
OARX_15909775.1	0.299293
OARX_8814349.1	0.296065
OARX_35497858.1	0.295725
OARX_19806337.1	0.289219
OARX_94349054.1	0.289144
OARX_88058957.1	0.287711
OARX_26231414.1	0.287559
s10353.1	0.286644
OARX_39147901.1	0.286144
OARX_116737201.1	0.285046
s38239.1	0.284419
OARX_111907035.1	0.284199
OARX_124339688.1	0.282146
s09625.1	0.28186
s07429.1	0.280208
s44053.1	0.279934
OARX_88915058.1	0.279773
OARX_110992791.1	0.279417
OARX_38472141.1	0.279061
OARX_11293420_X.1	0.2775
OARX_45554550.1	0.277445
OARX_102028326.1	0.27664
OARX_82254766.1	0.276269
OARX_121307417.1	0.274322
s06378.1	0.272764
OARX_124847482.1	0.27168
OARX_33843032.1	0.271508
s36336.1	0.271461
s20460.1	0.271211
OARX_110738281.1	0.271118
OARX_30397866.1	0.268931
OARX_119461444.1	0.267662
OARX_27076240.1	0.267599
OARX_121589828.1	0.266688
s44372.1	0.266238
s09194.1	0.266236
OARX_19024316.1	0.266138
OARX_25389769.1	0.266014
OARX_115792016.1	0.265856
OARX_14396780.1	0.264889
OARX_19681917.1	0.26481
s15552.1	0.264733
OARX_28451043_X.1	0.264296
OARX_120658270.1	0.26421
OARX_85483846.1	0.263706
OARX_50862265.1	0.262654
OARX_30312445.1	0.261627
s13516.1	0.261136
s43991.1	0.259692
OARX_97709391.1	0.259286
OARX_97737734.1	0.259286
OARX_31943721.1	0.259153
OARX_56169434_X.1	0.25746
s38969.1	0.25746
OARX_91551152.1	0.25713
OARX_102373562.1	0.256698
OARX_106722016.1	0.255826
s59064.1	0.255527
OARX_81674609.1	0.2535
s37539.1	0.253461
OARX_108789735.1	0.251689
OARX_108855097.1	0.251689
s75112.1	0.25154
OARX_40028377.1	0.247841
OARX_37921066.1	0.247832
OARX_100307878.1	0.247515
OARX_86601934.1	0.247377
OARX_116794094.1	0.24636
OARX_109845023.1	0.246144
OARX_102576796.1	0.244958
DU515244_528.1	0.243438
s10919.1	0.242606
OARX_102620828.1	0.242508
OARX_16640246.1	0.242381
DU211594_392.1	0.241965
OARX_28418646_X.1	0.24183
OARX_79448969.1	0.240151
OARX_58569265_X.1	0.239596
s47417.1	0.238982
OARX_6901932.1	0.238841
OARX_103335459.1	0.23879
OARX_38023667.1	0.238631
OARX_103255437.1	0.238484
s69242.1	0.237895
s59173.1	0.236744
DU365365_347.1	0.236004
OARX_108639305.1	0.234229
OARX_94104793.1	0.234133
OARX_82499695.1	0.232828
s58522.1	0.232717
s66300.1	0.232227
OARX_99182568.1	0.231302
OARX_38528597.1	0.230505
OARX_33849288.1	0.229664
s02716.1	0.228672
DU275403_434.1	0.227739
OARX_106502295.1	0.226906
OARX_59194976.1	0.226634
OARX_63707921.1	0.226194
OARX_45900764.1	0.225876
OARX_115104454.1	0.224251
OARX_10536833.1	0.223615
s22870.1	0.223391
s57129.1	0.222866
OARX_116844747.1	0.220966
OARX_46572093.1	0.217865
OARX_27752501.1	0.214914
OARX_78035854.1	0.214617
OARX_83642813.1	0.214048
OARX_29712188.1	0.213417
s63588.1	0.211734
s15143.1	0.211734
OARX_46123631.1	0.21116
OARX_110941776.1	0.210227
s42467.1	0.210208
OARX_42803740.1	0.210034
OARX_122489052.1	0.20877
OARX_74419004.1	0.208717
OARX_48941479.1	0.208299
s61445.1	0.207565
OARX_16603478.1	0.206854
OARX_34104748.1	0.205404
OARX_27593383_X.1	0.205376
s26339.1	0.205292
OARX_99017056.1	0.204527
OARX_124055111.1	0.203075
OARX_94072480.1	0.202878
OARX_105029577.1	0.20252
s50692.1	0.200058
s05480.1	0.200025
OARX_82205212.1	0.198751
OARX_53649799.1	0.197983
s20530.1	0.197688
OARX_32005669.1	0.195963
OARX_77758767.1	0.195304
s28386.1	0.195195
OARX_34048710.1	0.194703
OARX_120998827.1	0.194605
OARX_43227227.1	0.194435
OARX_38729534.1	0.193571
OARX_23931458.1	0.193523
OARX_88695514.1	0.192822
OARX_125318332.1	0.190854
OARX_29022612.1	0.19055
OARX_39685931.1	0.189724
s32655.1	0.187021
s05185.1	0.186141
s55080.1	0.185209
OARX_59327581.1	0.184651
OARX_59383635.1	0.184651
OARX_82005367.1	0.181629
OARX_47334694_X.1	0.181246
OARX_62844884.1	0.180277
OARX_22137336.1	0.180256
OARX_78696595.1	0.179718
OARX_47341177.1	0.179248
s18515.1	0.179189
OARX_115767547.1	0.178095
OARX_14861261.1	0.176963
OARX_66123878.1	0.176683
OARX_39032919.1	0.176539
OARX_75257260.1	0.175953
DU225785_452.1	0.174883
OARX_31663546.1	0.174294
s32665.1	0.173966
OARX_90873153.1	0.171801
OARX_94381187.1	0.171387
OARX_21736548.1	0.171034
OARX_126406510.1	0.170736
s04099.1	0.170276
OARX_73657722.1	0.169001
OARX_109619990.1	0.168751
s11037.1	0.168745
DU435115_188.1	0.168421
OARX_38247415.1	0.167269
s29067.1	0.166467
OARX_35237878.1	0.166259
OARX_73717778.1	0.165399
OARX_46276607.1	0.164723
OARX_76523631.1	0.164171
OARX_10909385.1	0.164061
OARX_72948383.1	0.164007
OARX_14822231.1	0.163957
s32042.1	0.163467
OARX_48493857.1	0.163016
OARX_104212127.1	0.161205
OARX_46842427.1	0.160235
DU330424_111.1	0.158043
OARX_126323247.1	0.157863
OARX_47252866.1	0.15744
OARX_32010983.1	0.155993
OARX_82943742.1	0.15489
OARX_120155115.1	0.154267
s54806.1	0.153856
OARX_74541037.1	0.152036
OARX_81842153.1	0.150597
OARX_56342973.1	0.150204
OARX_45718836.1	0.150159
s29549.1	0.14893
s09163.1	0.147251
OARX_124698743.1	0.145388
OARX_27060628.1	0.143515
OARX_113305737.1	0.143266
s12865.1	0.142394
OARX_110792720.1	0.141791
s08251.1	0.140561
OARX_10767975.1	0.140308
s09170.1	0.140043
OARX_115080641.1	0.139842
s44901.1	0.139675
OARX_102996728.1	0.139239
OARX_14104070.1	0.138875
OARX_87951292.1	0.1384
s02621.1	0.138015
OARX_97352456.1	0.137818
OARX_40762309.1	0.13757
OARX_94177459_X.1	0.136596
OARX_48374568.1	0.136391
OARX_16070481.1	0.136328
OARX_85406306.1	0.13583
OARX_46406525.1	0.134927
OARX_49564109.1	0.134286
OARX_89022750.1	0.1334
OARX_93384200.1	0.133315
OARX_86280642.1	0.13308
OARX_25481941.1	0.132798
OARX_29118704.1	0.130903
s39212.1	0.130234
OARX_120373463.1	0.129303
s72944.1	0.127542
OARX_111349974.1	0.127283
s63659.1	0.126799
OARX_119405720.1	0.126688
s38728.1	0.124993
OARX_82902165.1	0.124986
OARX_65208811.1	0.124628
OARX_19707716.1	0.123992
OARX_45655473.1	0.123301
OARX_13949178.1	0.121954
OARX_90978320.1	0.121629
OARX_87841793.1	0.120441
OARX_46749492.1	0.119992
OARX_107821331.1	0.118375
OARX_98505111_X.1	0.117822
OARX_39409681.1	0.11776
OARX_93669308.1	0.117509
OARX_108893660.1	0.117205
s13796.1	0.116008
OARX_82738279.1	0.115813
OARX_84396258.1	0.115557
OARX_51020466.1	0.115513
OARX_93308477.1	0.114928
s50907.1	0.11489
OARX_65809289.1	0.114541
s41698.1	0.114349
OARX_42340942.1	0.113814
s40094.1	0.111349
OARX_76389260.1	0.110855
OARX_115665260.1	0.110412
OARX_57823297.1	0.11012
OARX_118162943.1	0.109239
OARX_126267798.1	0.109237
OARX_117647840_X.1	0.107807
OARX_98843759.1	0.107492
OARX_14981939.1	0.107248
OARX_122314303.1	0.107144
OARX_124609231.1	0.10563
OARX_94234233.1	0.104349
s05322.1	0.102715
OARX_107127374.1	0.102668
OARX_34195379.1	0.101149
OARX_59257971.1	0.10027
OARX_31537208.1	0.0999941
OARX_65098948.1	0.099812
OARX_22662256.1	0.099558
OARX_81807292.1	0.0992169
OARX_7962626.1	0.0985486
s12140.1	0.0972209
OARX_82650389.1	0.0968562
OARX_63114333.1	0.0968401
OARX_101561365.1	0.0965185
OARX_51829860.1	0.0955569
OARX_77732488.1	0.0949807
s57473.1	0.0949233
OARX_91240608.1	0.0932687
OARX_91816958.1	0.0931335
s16893.1	0.0929318
OARX_47672856.1	0.0921531
OARX_113373957.1	0.0909197
OARX_105885515.1	0.090031
OARX_58238477.1	0.0897198
s22441.1	0.0896732
OARX_57905305.1	0.0895251
OARX_111523132.1	0.0894743
OARX_14749107.1	0.0887465
s44428.1	0.0886443
OARX_101340408.1	0.0884342
s22753.1	0.0877245
OARX_27143958.1	0.0876867
OARX_114352662.1	0.0875381
OARX_73014623.1	0.0872016
s38854.1	0.0871255
OARX_74277156.1	0.0870308
OARX_66060588_X.1	0.0864903
OARX_61843689.1	0.0862988
OARX_128945275.1	0.0861228
OARX_19939180.1	0.0857795
OARX_124587487.1	0.0854763
OARX_38701147.1	0.0840141
s25630.1	0.0800302
s30030.1	0.0792913
OARX_87987834.1	0.0787569
OARX_120573426.1	0.0786653
OARX_111110978.1	0.0781442
s33015.1	0.0777212
s63644.1	0.0769231
OARX_86777929.1	0.0767596
s51128.1	0.0748963
OARX_86548894.1	0.0738196
OARX_77931764.1	0.0733426
OARX_79396841.1	0.0727816
OARX_85386153.1	0.0726232
OARX_45805494.1	0.0724252
OARX_49091839.1	0.0723619
OARX_126370692.1	0.0722365
OARX_18967005.1	0.0719772
OARX_77672346.1	0.0714215
OARX_43262963.1	0.070156
s66695.1	0.0697014
OARX_117613328.1	0.0692347
s64012.1	0.0691069
OARX_58608882.1	0.0678459
s31917.1	0.067464
OARX_110276633.1	0.06722
OARX_82237539.1	0.0672123
OARX_123983913.1	0.0662175
s59231.1	0.0661809
s10157.1	0.0640346
OARX_25020500.1	0.0636331
s48236.1	0.0634514
OARX_112321655.1	0.0633241
OARX_88907191.1	0.06288
s18343.1	0.0611836
OARX_119510626.1	0.0607872
s29064.1	0.0601125
OARX_11374295.1	0.0594075
OARX_16099179.1	0.0587795
OARX_49519450.1	0.0582556
OARX_94139261.1	0.0576509
OARX_74042896.1	0.0568429
OARX_72236232.1	0.0562928
OARX_31311031.1	0.0561628
OARX_74662147.1	0.0560125
OARX_85511821.1	0.0555207
s69033.1	0.0553582
OARX_108776576.1	0.0551569
OARX_30265199.1	0.0548526
OARX_46889291.1	0.0545315
OARX_98047198.1	0.0533711
OARX_88214758.1	0.0526512
s72987.1	0.0524178
OARX_79152365.1	0.0511499
OARX_105818480.1	0.0508647
OARX_114693376.1	0.049879
OARX_39393079.1	0.0497837
OARX_39416790.1	0.0497837
s60734.1	0.0494134
OARX_102128134.1	0.0487746
OARX_30148765.1	0.0469474
s41047.1	0.0467706
OARX_114489693.1	0.0466887
OARX_114499659.1	0.0466887
OARX_58690735.1	0.0463681
s64293.1	0.0458637
s66303.1	0.0449996
OARX_101233724.1	0.0449996
OARX_49416451.1	0.0448425
OARX_124092052.1	0.0446177
OARX_91845722.1	0.0439783
s20869.1	0.0437838
s54281.1	0.0436834
OARX_128836973.1	0.0434128
OARX_82849213.1	0.0433216
s40966.1	0.0427639
s35774.1	0.0424706
OARX_42390777.1	0.0418957
OARX_80686953.1	0.0418892
OARX_114129627_X.1	0.0417898
s10736.1	0.0407982
s17179.1	0.0405761
OARX_126170081.1	0.0403073
OARX_16878309.1	0.0398872
s53551.1	0.0396709
s67385.1	0.0396019
OARX_104262179.1	0.0395146
s26280.1	0.0388139
OARX_31247483.1	0.038475
OARX_85579388.1	0.0381324
OARX_106495830.1	0.0360771
OARX_122339558.1	0.0357732
s26936.1	0.0357384
OARX_11337494.1	0.0346665
s41440.1	0.0342758
s01703.1	0.0340147
OARX_86633094.1	0.033887
s24801.1	0.0331749
OARX_115093283.1	0.0325219
OARX_97380680.1	0.0323537
s51129.1	0.0323533
OARX_110838676.1	0.0321598
OARX_86516113.1	0.0321027
OARX_111386041.1	0.0312202
OARX_87506790.1	0.0308196
s37016.1	0.0299447
s06937.1	0.0298513
OARX_116773551.1	0.0294335
DU276270_427.1	0.0293218
OARX_38404244.1	0.0288644
s64888.1	0.0282462
OARX_121839918.1	0.0277167
s07719.1	0.0274541
s48591.1	0.0273226
OARX_87726916.1	0.0270306
OARX_91649730.1	0.0259611
OARX_40710286.1	0.0239365
OARX_30541022_X.1	0.0237155
s65847.1	0.0235554
OARX_117569024.1	0.0222013
OARX_86468715_X.1	0.0208264
OARX_118770487.1	0.0200959
OARX_124202789.1	0.0198928
OARX_86997550.1	0.0197771
OARX_119727383.1	0.0185348
OARX_105010088.1	0.0180165
OARX_35326302.1	0.0178287
OARX_30385723.1	0.0165357
OARX_94504309.1	0.0165175
OARX_114779008.1	0.01564
OARX_64628601.1	0.0153608
s28564.1	0.0151405
OARX_67322374.1	0.0150098
OARX_31810590.1	0.0149911
s74057.1	0.0149433
OARX_119423593.1	0.0148626
OARX_51842287.1	0.0144017
s04229.1	0.0107845
s13231.1	0.0106447
OARX_19013778.1	0.010109
OARX_98701611.1	0.00963789
s25326.1	0.00939511
s15891.1	0.00897532
OARX_74337718.1	0.00828277
OARX_124402618.1	0.00797913
OARX_121076593.1	0.0079739
OARX_119762219.1	0.00761072
s21022.1	0.00701168
s10416.1	0.00648718
OARX_38896560_X.1	0.00597954
OARX_78959608.1	0.00564726
OARX_59578440.1	0.00456852
s71449.1	0.0036243
OARX_98758666.1	0.00233685
OARX_65525766.1	0.00232269
OARX_15341607.1	0.00153605
s22414.1	0.00139459
s53403.1	0.00103587
OARX_49303945.1	0.000595431
OARX_125571053.1	1.75e-05

## Sheet: Table S2
Table S2 Dorper each SNP iHS value
SNP name	iHS value
OARX_38729534.1	6.63146
OARX_48129885.1	4.12202
OARX_31810590.1	3.72676
OARX_95154058.1	3.56076
OARX_39393079.1	3.29451
s12123.1	3.13577
OARX_111424482.1	3.02106
OARX_46406525.1	3.00415
OARX_39032919.1	2.97498
OARX_115665260.1	2.84041
OARX_40368091.1	2.68155
OARX_40013563.1	2.56864
OARX_73028561.1	2.5642
OARX_90978320.1	2.3704
OARX_39416790.1	2.33456
OARX_76572936.1	2.29972
OARX_56342973.1	2.22773
OARX_124895181.1	2.20581
OARX_48493857.1	2.06685
OARX_51842287.1	2.06351
s27938.1	2.05708
OARX_72985145.1	1.93611
DU330424_111.1	1.932
OARX_43149441.1	1.88223
s64486.1	1.83771
OARX_45805494.1	1.82873
OARX_108789735.1	1.80677
OARX_111110978.1	1.80269
OARX_125616534.1	1.78873
OARX_115405200.1	1.77397
OARX_43377931.1	1.73658
OARX_40121539.1	1.72037
OARX_109082678_X.1	1.71864
OARX_108855097.1	1.71828
OARX_79293639.1	1.71502
OARX_59257971.1	1.6737
OARX_125084587.1	1.6736
OARX_106722016.1	1.66495
OARX_42574947_X.1	1.65587
OARX_110420444_X.1	1.65117
OARX_28862933.1	1.63279
OARX_29226488.1	1.62392
OARX_82319638.1	1.61949
s30633.1	1.59138
OARX_40762309.1	1.56773
s60331.1	1.56696
OARX_85734914.1	1.55174
OARX_83642813.1	1.5371
s51128.1	1.5075
OARX_107941501.1	1.50441
OARX_108776576.1	1.49206
s06965.1	1.49127
OARX_38363560.1	1.47793
OARX_78232119.1	1.46041
OARX_81842153.1	1.44946
OARX_120191387.1	1.42139
s38728.1	1.40745
OARX_125309932.1	1.35385
OARX_82499695.1	1.33778
s10517.1	1.33062
OARX_119405720.1	1.32927
OARX_109922971.1	1.32053
OARX_125632426.1	1.3197
OARX_49416451.1	1.31638
OARX_116720248.1	1.30102
s30030.1	1.30073
OARX_82237539.1	1.29635
OARX_74828607.1	1.28085
OARX_31883742.1	1.27276
OARX_10909385.1	1.25915
OARX_74337718.1	1.25674
OARX_82738279.1	1.25398
OARX_106780979.1	1.2512
OARX_107723746.1	1.24032
s25630.1	1.23701
OARX_15615564.1	1.23001
OARX_15658171.1	1.23001
OARX_40803822.1	1.22572
OARX_121097572.1	1.22442
OARX_11088122.1	1.21818
OARX_10672687.1	1.21748
OARX_43227227.1	1.20511
OARX_106502295.1	1.20372
OARX_38965990.1	1.20029
s06378.1	1.19672
OARX_39308630.1	1.19633
OARX_87506790.1	1.19621
OARX_76389260.1	1.19578
s59443.1	1.18406
s56924.1	1.17358
s26116.1	1.16328
OARX_120562732.1	1.16202
OARX_84110445.1	1.15831
s34323.1	1.15024
s31031.1	1.14967
OARX_114129627_X.1	1.14103
s40966.1	1.13823
OARX_124402618.1	1.13823
s70954.1	1.13697
s68662.1	1.12838
s70693.1	1.12625
OARX_86740281.1	1.12132
OARX_31943721.1	1.11602
OARX_9037102.1	1.1108
OARX_11127459.1	1.08748
OARX_77450647.1	1.08665
OARX_114431127.1	1.08218
OARX_107023858.1	1.08075
OARX_84431875.1	1.07882
OARX_76459539.1	1.07802
OARX_59327581.1	1.07575
OARX_59383635.1	1.07575
OARX_78959608.1	1.07454
OARX_119308133.1	1.07418
OARX_124785484.1	1.06659
s07406.1	1.06375
OARX_110496762.1	1.06071
OARX_82456134.1	1.05773
OARX_119932740_X.1	1.05386
OARX_31484840.1	1.0458
OARX_110992791.1	1.0416
OARX_86601934.1	1.04019
s21022.1	1.03283
OARX_14396780.1	1.03193
OARX_125057668.1	1.02734
OARX_125044988.1	1.02734
OARX_125031440.1	1.02734
OARX_114054710.1	1.02585
OARX_14981939.1	1.02252
OARX_122522511.1	1.02131
OARX_58569265_X.1	1.0207
OARX_49519450.1	1.0193
OARX_78903642.1	1.01626
OARX_45912356.1	1.00925
OARX_112825323.1	1.00285
OARX_109181441.1	1.00282
s53196.1	0.998694
OARX_46097533.1	0.997583
s34139.1	0.99555
OARX_114537909_X.1	0.986106
OARX_113274860.1	0.982483
OARX_29911993.1	0.982453
OARX_105885515.1	0.979696
s26335.1	0.977898
OARX_15446991.1	0.977371
OARX_43066335.1	0.975332
OARX_75975749.1	0.970469
OARX_73014623.1	0.95756
OARX_85511821.1	0.955501
OARX_126032756.1	0.954613
OARX_42299151.1	0.94657
OARX_34258733.1	0.944733
OARX_94072480.1	0.944118
OARX_81029058.1	0.943649
OARX_105101318.1	0.943193
OARX_76432979.1	0.930712
OARX_121272018.1	0.925974
OARX_75548381.1	0.918963
OARX_39345333.1	0.912956
OARX_106812901.1	0.907175
OARX_111907035.1	0.906762
OARX_11260093.1	0.899164
OARX_124055111.1	0.897724
OARX_21374798.1	0.886299
OARX_22620616.1	0.884751
s36498.1	0.875418
s51129.1	0.872935
OARX_78028955.1	0.868988
s71744.1	0.868112
s48591.1	0.867582
OARX_43262963.1	0.86418
OARX_81674609.1	0.859743
OARX_88665373.1	0.858283
OARX_103378386.1	0.85673
OARX_114499659.1	0.855995
OARX_31607255.1	0.853326
s13231.1	0.851989
OARX_30541022_X.1	0.847648
OARX_119423593.1	0.846547
s47072.1	0.845191
OARX_119370187.1	0.843727
OARX_126370692.1	0.841365
OARX_81758554.1	0.840699
OARX_47341177.1	0.837159
OARX_63611179.1	0.833068
OARX_11293420_X.1	0.833061
s10919.1	0.832718
OARX_49091839.1	0.832633
s70544.1	0.830855
OARX_29712188.1	0.829437
OARX_116116277.1	0.828243
OARX_112805650.1	0.826402
OARX_46551013.1	0.825809
OARX_39956656.1	0.824937
OARX_88214758.1	0.824608
OARX_46792464.1	0.823163
s47417.1	0.819678
OARX_38618108.1	0.819675
s21169.1	0.819657
OARX_100307878.1	0.819279
s72924.1	0.813936
OARX_27484186.1	0.811963
OARX_98701611.1	0.811164
s17286.1	0.807674
s46983.1	0.80683
OARX_75257260.1	0.804989
OARX_103524806.1	0.800812
s20995.1	0.799768
OARX_109825816.1	0.794112
OARX_98758666.1	0.791135
s26403.1	0.785426
OARX_110941776.1	0.784936
OARX_19806337.1	0.783457
s19711.1	0.780545
OARX_78222056.1	0.779822
OARX_120706037.1	0.77744
OARX_106976757.1	0.776167
OARX_125571053.1	0.76793
OARX_78696595.1	0.76631
OARX_8814349.1	0.763682
OARX_38431131.1	0.762989
OARX_63276879.1	0.762542
OARX_65098948.1	0.753262
OARX_58621412.1	0.75111
OARX_107094834.1	0.74946
OARX_10578530.1	0.747051
OAR2_207144869.1	0.73668
OARX_82755160.1	0.733082
OARX_38801624.1	0.732319
OARX_121227759.1	0.730446
OARX_113214394.1	0.726248
OARX_93669308.1	0.722135
OARX_76354330.1	0.721218
OARX_17003361.1	0.720636
OARX_14382090.1	0.719961
OARX_97352456.1	0.718334
OARX_125711423_X.1	0.713453
OARX_87110835.1	0.71198
250506CS3900539000001_471.1	0.710291
OARX_73769365.1	0.709575
s49888.1	0.709171
s21669.1	0.707906
s63644.1	0.70756
OARX_11393124.1	0.707338
s61624.1	0.707246
OARX_28932453.1	0.70605
OARX_120409273.1	0.704404
OARX_63571789.1	0.70411
OARX_107127374.1	0.700794
OARX_107821331.1	0.700535
OARX_119461444.1	0.696481
OARX_11175000.1	0.693194
OARX_116737201.1	0.692966
OARX_86516113.1	0.690355
OARX_40933614.1	0.688062
OARX_82418640.1	0.683845
s17709.1	0.676633
OARX_121716434.1	0.668106
OARX_80686953.1	0.667911
OARX_10602383.1	0.666141
s05480.1	0.665654
s67468.1	0.664252
OARX_120110524.1	0.663471
OARX_121307417.1	0.660234
OARX_117647840_X.1	0.658534
OARX_47556312.1	0.657761
OARX_110869172.1	0.650056
OARX_125516668.1	0.649717
OARX_74662147.1	0.649377
s13516.1	0.648991
OARX_121352349_X.1	0.64735
s19301.1	0.647077
s61050.1	0.643629
s51310.1	0.643051
OARX_118061045.1	0.639877
s32042.1	0.637073
DU225785_452.1	0.633799
OARX_26231414.1	0.629775
s61416.1	0.628685
OARX_114953976.1	0.624523
OARX_107058174.1	0.623876
s26280.1	0.623255
OARX_95319840.1	0.616336
OARX_11233802.1	0.616063
OARX_108414989.1	0.610985
OARX_123999513.1	0.609116
OARX_81713091.1	0.608354
s69242.1	0.606893
s44053.1	0.605028
OARX_124109117.1	0.602923
OARX_31405619.1	0.598865
OARX_21736548.1	0.594326
s15891.1	0.59419
s26134.1	0.593034
OARX_45655473.1	0.591108
OARX_114489693.1	0.589051
OARX_113525578.1	0.587804
OARX_79152365.1	0.587255
DU364592_286.1	0.584135
OARX_102847527.1	0.583385
OARX_27398107.1	0.582837
OARX_31838440.1	0.578742
OARX_111349974.1	0.578482
s07719.1	0.577981
OARX_14005468.1	0.577466
s28984.1	0.57608
OARX_29188769.1	0.575703
OARX_98622500.1	0.570874
OARX_114805072.1	0.566163
OARX_19939180.1	0.565843
OARX_113305737.1	0.564793
OARX_74277156.1	0.564411
OARX_26219241.1	0.562553
s27905.1	0.562183
OARX_10840799.1	0.558661
OARX_94349054.1	0.557489
s75871.1	0.557476
OARX_98843759.1	0.557073
OARX_119492809.1	0.555952
s44372.1	0.555355
OARX_25296412.1	0.555355
OARX_102896730.1	0.554691
OARX_84464739.1	0.554653
OARX_18553357.1	0.553723
OARX_16921240.1	0.552819
OARX_122339558.1	0.551087
DU450886_629.1	0.548247
OARX_116773551.1	0.548181
OARX_123732583.1	0.5472
OARX_124202789.1	0.546825
OARX_77492598.1	0.545956
OARX_128836973.1	0.545452
OARX_105936332.1	0.544066
s27837.1	0.542013
s38658.1	0.539822
OARX_84195922.1	0.538246
s25326.1	0.538108
OARX_110738281.1	0.538049
s32665.1	0.537371
OARX_46542447.1	0.535988
s35782.1	0.531306
OARX_52789083.1	0.529066
OARX_122134724.1	0.529065
s49643.1	0.52891
OARX_59571364.1	0.527913
OARX_45900764.1	0.526585
DU240765_244.1	0.521945
OARX_77931764.1	0.521306
s41440.1	0.521275
OARX_117569024.1	0.520407
OARX_25614788.1	0.519648
OARX_126170081.1	0.519242
OARX_42837583.1	0.516983
OARX_74419004.1	0.516308
OARX_82005367.1	0.514162
s75715.1	0.510366
OARX_82254766.1	0.510268
s54349.1	0.509373
OARX_35208552.1	0.508085
OARX_108639305.1	0.506743
OARX_19024316.1	0.505651
DU211594_392.1	0.504246
OARX_40322359.1	0.503052
s54765.1	0.502088
OARX_121598412.1	0.501736
OARX_108993743.1	0.501667
OARX_38309659.1	0.498855
OARX_111462941.1	0.498692
OARX_16421483.1	0.497843
s42604.1	0.496729
OARX_57792792.1	0.494471
s43991.1	0.490438
OARX_108932732.1	0.48961
OARX_120573426.1	0.489255
OARX_30148765.1	0.487293
s09194.1	0.487092
OARX_72351736.1	0.485918
OARX_123769039.1	0.484583
s69033.1	0.483686
s48537.1	0.483313
OARX_29830880.1	0.481864
OARX_11591314.1	0.480625
s44247.1	0.48054
s36628.1	0.478762
OARX_75135131.1	0.477531
OARX_13949178.1	0.47658
OARX_39409681.1	0.476499
s59821.1	0.473972
OARX_35237878.1	0.47296
s22441.1	0.471838
OARX_101587181.1	0.470142
OARX_78035854.1	0.470107
OARX_85386153.1	0.46915
OARX_85406306.1	0.46915
OARX_15558300.1	0.466723
OARX_86997550.1	0.465532
s39212.1	0.464333
s57473.1	0.461915
OARX_21677876.1	0.45882
s33410.1	0.458031
OARX_108427445.1	0.457741
OARX_102234369.1	0.456464
OARX_85579388.1	0.456361
OARX_40992335.1	0.455433
OARX_78631468.1	0.453665
OARX_48941479.1	0.453568
s08752.1	0.453011
OARX_112854991_X.1	0.451841
DU276270_427.1	0.451547
OARX_97818989.1	0.448261
OARX_110184293_X.1	0.446054
OARX_8657405_X.1	0.443302
OARX_48392113.1	0.443075
OARX_105029577.1	0.442174
OARX_48063847.1	0.442116
OARX_82205212.1	0.441989
OARX_49135019.1	0.441988
OARX_87598993.1	0.441276
OARX_55032299.1	0.44114
OARX_73629464.1	0.439288
OARX_11374295.1	0.436702
s09170.1	0.434956
OARX_109619990.1	0.434956
OARX_101475197.1	0.434261
OARX_82849213.1	0.433851
OARX_25892929.1	0.433665
s29549.1	0.433024
OARX_38701147.1	0.430816
OARX_81807292.1	0.429789
OARX_46703391.1	0.427834
OARX_33986060.1	0.426798
s07429.1	0.425108
OARX_81857193.1	0.423261
OARX_10536833.1	0.42117
s74057.1	0.42077
OARX_40028377.1	0.417801
OARX_56302763.1	0.415683
OARX_56195013.1	0.415683
OARX_115093283.1	0.414561
OARX_20950879_X.1	0.412429
OARX_119702496.1	0.41177
OARX_16568246.1	0.411511
OARX_93308477.1	0.409559
OARX_27060628.1	0.409455
s39837.1	0.406173
OARX_28682429.1	0.406173
OARX_82902165.1	0.405513
OARX_106555138.1	0.403949
s52811.1	0.403699
OARX_88410255.1	0.403219
OARX_75858603.1	0.401954
OARX_75879873.1	0.401954
OARX_75897416.1	0.401954
OARX_75954534.1	0.401954
OARX_88051650.1	0.401353
OARX_25389769.1	0.401278
OARX_78982967.1	0.400811
OARX_102620828.1	0.400644
s02385.1	0.400114
s49278.1	0.399794
OARX_25770728.1	0.399164
OARX_16878309.1	0.398347
s32336.1	0.396036
OARX_11161852.1	0.394681
s38327.1	0.392526
OARX_46276607.1	0.392255
s04099.1	0.388848
OARX_87273449.1	0.388195
OARX_101276703.1	0.387563
OARX_85664346.1	0.383471
OARX_115528761.1	0.382827
OARX_124092052.1	0.382722
OARX_22662256.1	0.381617
OARX_91326772.1	0.380698
OARX_122571365.1	0.38034
OARX_14749107.1	0.379951
OARX_89022750.1	0.378707
OARX_43295474.1	0.37746
OARX_80520919.1	0.377234
OAR23_48530053.1	0.373698
OARX_52405690.1	0.372309
OARX_8907381.1	0.37086
OARX_38023667.1	0.370702
OARX_40911514.1	0.365516
OARX_116844747.1	0.364583
s07963.1	0.362672
OARX_74042896.1	0.361942
OARX_76192158.1	0.361252
OARX_124698743.1	0.357001
OARX_77758767.1	0.356312
OARX_53514671.1	0.354088
OARX_122403019.1	0.352513
s66286.1	0.351457
OARX_16099179.1	0.350477
OARX_91816958.1	0.349834
s17025.1	0.346711
OARX_116794094.1	0.345157
OARX_47672856.1	0.344829
OARX_31247483.1	0.3448
s29067.1	0.344167
OARX_125318332.1	0.343264
s43972.1	0.341539
s12092.1	0.340298
s23593.1	0.34016
OARX_27316457_X.1	0.340085
OARX_115792016.1	0.339952
OARX_124978161.1	0.338618
s71449.1	0.338166
s53551.1	0.337011
OARX_114779008.1	0.33675
OARX_114352662.1	0.336196
OARX_123983913.1	0.336183
s71112.1	0.335887
OARX_123880994.1	0.335764
OARX_112600953.1	0.335696
OARX_126267798.1	0.334019
OARX_94381187.1	0.332743
s53403.1	0.332233
OARX_91845722.1	0.332117
OARX_47893170_X.1	0.331541
s10157.1	0.330394
OARX_5854800_X.1	0.330343
OARX_116055833.1	0.330166
OARX_107298804.1	0.329389
s50831.1	0.328755
s24603.1	0.32871
OARX_23062957.1	0.328228
s33439.1	0.326924
OARX_65208811.1	0.325351
OARX_26091319.1	0.32535
OARX_108965768.1	0.32262
s31052.1	0.322024
OARX_74459953.1	0.321128
OARX_23992544.1	0.320581
s38239.1	0.320154
s24415.1	0.317743
s59064.1	0.316767
OARX_32010983.1	0.316375
OARX_15341607.1	0.31534
OARX_15353072.1	0.31534
s75112.1	0.314524
OARX_11337494.1	0.314486
s31310.1	0.312859
OARX_76523631.1	0.31193
s46450.1	0.311047
s21042.1	0.310121
s67385.1	0.309857
OARX_121076593.1	0.309476
OARX_17042330.1	0.309253
OARX_16012715.1	0.308897
OARX_56169434_X.1	0.307733
s38969.1	0.307733
s15552.1	0.306934
OARX_42803740.1	0.306468
OARX_19707716.1	0.306008
OARX_112321655.1	0.305796
OARX_39212838.1	0.30559
OARX_87726916.1	0.304879
OARX_15909775.1	0.304231
DU365365_347.1	0.304115
OARX_53649799.1	0.302394
OARX_102373562.1	0.301569
s47155.1	0.301348
s32659.1	0.300951
OARX_55773697.1	0.299294
OARX_102259548.1	0.298885
OARX_22733191.1	0.296329
OARX_94234233.1	0.293496
OARX_40710286.1	0.293488
s13796.1	0.292084
OARX_31599682.1	0.292053
DU322639_600.1	0.289905
OARX_122314303.1	0.289339
s22255.1	0.289318
OARX_49045095.1	0.288148
s42190.1	0.287982
s06458.1	0.287388
OARX_38939916.1	0.28465
s64888.1	0.284611
OARX_27524192.1	0.284385
OARX_112416866.1	0.284258
OARX_10965528.1	0.284003
OARX_73686229.1	0.283612
OARX_103999250.1	0.282563
s18515.1	0.282196
OARX_25730959.1	0.281013
OARX_88646756.1	0.280937
s59173.1	0.280516
s64012.1	0.278837
s26339.1	0.278457
OARX_35326302.1	0.278181
OARX_39901562.1	0.277419
OARX_109443858.1	0.276898
OARX_110838676.1	0.276846
s29064.1	0.276843
OARX_64137688.1	0.276612
OARX_26418059.1	0.276303
OARX_87058315.1	0.27539
s05978.1	0.274776
OARX_42467421.1	0.274029
OARX_49700805.1	0.273432
OARX_98047198.1	0.273264
s06937.1	0.270623
s75962.1	0.268757
s14505.1	0.268454
OARX_117671978.1	0.268406
s21331.1	0.267749
DU492411_505.1	0.267679
OARX_14822231.1	0.267043
OARX_30385723.1	0.266784
s56930.1	0.266364
s23827.1	0.265287
OARX_82293389.1	0.264877
OARX_39147901.1	0.263831
DU199514_430.1	0.263705
OARX_104184983.1	0.26217
s32144.1	0.26217
OARX_38201398.1	0.26197
OARX_39001399.1	0.26121
OARX_81899362.1	0.260881
OARX_84338138.1	0.258559
OARX_91240608.1	0.258451
OARX_34104748.1	0.257992
s35774.1	0.256574
OARX_93384200.1	0.25619
OARX_99017056.1	0.255224
OARX_102996728.1	0.254928
s02621.1	0.25428
OARX_94104793.1	0.253867
OARX_78089621.1	0.249761
OARX_91172883.1	0.248902
OARX_42676383.1	0.248849
OARX_103255437.1	0.24759
OARX_59578440.1	0.24528
OARX_46572093.1	0.244332
OARX_113035178.1	0.243686
OARX_31537208.1	0.243332
OARX_8267269.1	0.243315
s41277.1	0.241936
s01703.1	0.241285
OARX_86468715_X.1	0.240372
s11286.1	0.24013
s54806.1	0.239891
s12053.1	0.239702
s41053.1	0.239702
OARX_23931458.1	0.237771
OARX_90906078.1	0.237147
OARX_103335459.1	0.235964
OARX_28886935.1	0.234449
s32655.1	0.234065
OARX_29249212.1	0.233166
OARX_82943742.1	0.232269
OARX_31437911.1	0.230969
OARX_57905305.1	0.230893
s09625.1	0.230845
DU428697_498.1	0.230496
OARX_119510626.1	0.230318
OARX_124733388.1	0.227298
OARX_22407231.1	0.226366
OARX_49281832.1	0.225975
OARX_10802557.1	0.225267
OARX_46123631.1	0.224839
OARX_86548894.1	0.223907
OARX_104212127.1	0.222341
OARX_29022612.1	0.221465
OARX_102128134.1	0.22102
OARX_27593383_X.1	0.220558
s05322.1	0.219492
OARX_7998478.1	0.218824
OARX_67322374.1	0.218097
OARX_111523132.1	0.217399
OARX_119953271.1	0.217039
OARX_58608882.1	0.216673
OARX_114100188.1	0.21666
OARX_109845023.1	0.216352
OARX_16603478.1	0.215752
s73460.1	0.213365
OARX_121778609.1	0.212824
OARX_121995198.1	0.212397
OARX_105162278.1	0.211177
OARX_110234399.1	0.210612
OARX_104101047.1	0.20967
OARX_98549010.1	0.209217
OARX_30312445.1	0.207863
s00084.1	0.207843
OARX_115080641.1	0.206784
OARX_109545230.1	0.205445
OARX_30491298_X.1	0.204993
OARX_29146959.1	0.204926
s10893.1	0.204127
OARX_120373463.1	0.203574
OARX_85483846.1	0.203479
s15257.1	0.20334
OARX_98505111_X.1	0.202686
OARX_91551152.1	0.201881
s12906.1	0.201398
s47245.1	0.201334
OARX_34048710.1	0.201011
OARX_11486431.1	0.200907
OARX_110792720.1	0.200887
OARX_51829860.1	0.200349
s48236.1	0.200212
OARX_28842785.1	0.199301
s39146.1	0.197965
s58522.1	0.197799
OARX_104301327.1	0.196947
OARX_111190102.1	0.196405
OARX_30456682.1	0.19593
OARX_73717778.1	0.19576
OARX_108475651.1	0.195505
s34020.1	0.195505
OARX_115767547.1	0.194567
OARX_124847482.1	0.193963
OARX_65030113.1	0.193187
s01718.1	0.191977
OARX_102028326.1	0.191527
OARX_50862265.1	0.190087
s34732.1	0.189964
OARX_102920566.1	0.189817
OARX_27576676.1	0.189113
OARX_53932317.1	0.187937
OARX_105010088.1	0.187385
OARX_64628601.1	0.18641
OARX_65809289.1	0.186403
OARX_46491130.1	0.186267
OARX_43335176.1	0.185886
OARX_33849288.1	0.185073
OARX_110276633.1	0.184133
OARX_24311503.1	0.183789
s60734.1	0.18357
OARX_95550695.1	0.183535
OARX_25080774.1	0.182206
OARX_22199486.1	0.181376
s30825.1	0.181274
OARX_71592298.1	0.180868
s37016.1	0.180351
OARX_112464882.1	0.180253
s05401.1	0.180232
OARX_95372410.1	0.180088
OARX_120658270.1	0.178742
OARX_125130516.1	0.178397
s41047.1	0.177871
OARX_98649121.1	0.176252
s61888.1	0.175939
s10736.1	0.175225
s52126.1	0.175174
OARX_16041606.1	0.174935
s10416.1	0.17489
s44107.1	0.1734
OARX_124453154.1	0.172988
s50909.1	0.172779
OARX_46956289.1	0.171762
OARX_84149219.1	0.169351
OARX_121839918.1	0.167962
OARX_16106124.1	0.167419
OARX_22137336.1	0.166973
s16893.1	0.166968
OARX_115104454.1	0.166952
OARX_91745643.1	0.166688
s17179.1	0.165245
OARX_77318524.1	0.163761
OARX_27289624.1	0.163455
s39817.1	0.162817
s26041.1	0.16183
OARX_25431652.1	0.160435
OARX_78197954.1	0.159375
OARX_25473829.1	0.158894
OARX_31663546.1	0.158658
s35549.1	0.158247
OARX_114693376.1	0.158153
OARX_27076240.1	0.157993
OARX_49351860.1	0.157839
s37526.1	0.156903
s53538.1	0.155679
DU435115_188.1	0.15562
OARX_10767975.1	0.15539
s05185.1	0.153227
s17168.1	0.151825
OARX_101330524.1	0.1515
s02716.1	0.150588
s74637.1	0.150483
OARX_124339688.1	0.149533
s50692.1	0.148568
s68313.1	0.146874
s22414.1	0.144924
s12140.1	0.144394
s72987.1	0.144221
OARX_25481941.1	0.143635
OARX_113373957.1	0.142982
OARX_62844884.1	0.142818
OARX_83773452.1	0.142658
OARX_18967005.1	0.139915
OARX_84212352_X.1	0.139521
OARX_47334694_X.1	0.137454
OARX_113174546.1	0.137133
s45125.1	0.133901
OARX_63240964.1	0.131416
s29953.1	0.131384
OARX_66060588_X.1	0.131297
s22753.1	0.13081
s11827.1	0.130772
s32457.1	0.130728
s40094.1	0.129376
OARX_88907191.1	0.129267
OARX_101561365.1	0.128942
OARX_128945275.1	0.128527
s45030.1	0.128475
s29949.1	0.127647
OARX_83911613.1	0.127621
DU275403_434.1	0.127414
OARX_48653254.1	0.127232
OARX_86280642.1	0.126376
s62013.1	0.125505
OARX_119235356.1	0.12491
s03197.1	0.124658
s65847.1	0.124611
OARX_129007775.1	0.12282
OARX_85534087.1	0.122764
s17468.1	0.122336
OARX_118770487.1	0.121996
OARX_14861261.1	0.121685
s28564.1	0.121625
OARX_39570821_X.1	0.120926
OARX_124970841.1	0.120756
OARX_118724712.1	0.119561
s64293.1	0.118322
OARX_38346902.1	0.117767
OARX_92007136.1	0.11756
OARX_11655327.1	0.116627
s06926.1	0.11547
OARX_42340942.1	0.114874
OARX_82679761.1	0.114866
OARX_82650389.1	0.114866
OARX_31311031.1	0.114387
OARX_65525766.1	0.114049
OARX_91212655.1	0.113273
OARX_26259689.1	0.113191
OARX_8095004.1	0.110353
s55183.1	0.108522
OARX_26036045.1	0.107695
OARX_107304730.1	0.107229
OARX_30397866.1	0.106312
OARX_110594072.1	0.105872
OARX_114576371.1	0.105675
OARX_87841793.1	0.104906
s72944.1	0.103287
s26936.1	0.102581
s54281.1	0.101427
OARX_115205577.1	0.100977
s71037.1	0.100732
s48622.1	0.100419
OARX_54412853.1	0.100227
s21099.1	0.100003
OARX_38247415.1	0.0984815
s18434.1	0.0983195
OARX_81017616.1	0.0977126
s05550.1	0.0974501
OARX_51960372.1	0.0973065
DU515244_528.1	0.0964015
OARX_121608149.1	0.0955579
OARX_25020500.1	0.0954551
OARX_46842427.1	0.0950116
OARX_38896560_X.1	0.094887
OARX_32005669.1	0.0934459
OARX_121809968.1	0.0933856
OARX_19833738.1	0.0931402
s08251.1	0.0917575
OARX_88915058.1	0.0917416
s44901.1	0.0915269
OARX_33804882.1	0.0912343
OARX_37504418.1	0.0905601
OARX_38404244.1	0.0896056
OARX_102187315.1	0.0885466
OARX_102676774.1	0.0885102
OARX_101512543.1	0.0877539
OARX_22011518.1	0.0877243
OARX_88266152.1	0.0865161
OARX_61737376.1	0.0863249
OARX_61745327.1	0.0863249
OARX_72822977.1	0.0858808
OARX_82566242.1	0.0856493
OARX_79396841.1	0.085237
OARX_94177459_X.1	0.0849279
OARX_27752501.1	0.0846166
OARX_124587487.1	0.0841535
s29254.1	0.0839213
OARX_98312534.1	0.0833584
OARX_129095549.1	0.0822303
s15738.1	0.0814161
OARX_48110587.1	0.0809972
OARX_38777888.1	0.0799187
s66695.1	0.0798929
s57129.1	0.0798144
OARX_120155115.1	0.0788538
OARX_42390777.1	0.078688
s61601.1	0.0783026
OARX_26968286.1	0.0782115
OARX_29948603.1	0.07764
OARX_83698455.1	0.0770813
OARX_102576796.1	0.0769836
s50907.1	0.0763557
s74614.1	0.0762897
OARX_116493570.1	0.0761185
s26005.1	0.075348
OARX_79448969.1	0.0753393
OARX_14214233.1	0.0751318
OARX_33843032.1	0.0748518
OARX_14876499.1	0.0743735
OARX_52977852.1	0.0742917
OARX_94504309.1	0.0741889
OARX_102961116.1	0.0735254
OARX_34195379.1	0.0730512
s04229.1	0.0729888
OARX_77732488.1	0.0729074
s46003.1	0.0725363
s42548.1	0.0725274
OARX_14057975.1	0.0723207
s03694.1	0.0710676
DU383316_402.1	0.0708479
OARX_47386142_X.1	0.0704874
OARX_53985636.1	0.0701449
DU179310_361.1	0.0701123
OARX_46889291.1	0.0699652
OARX_106495830.1	0.0694571
s20869.1	0.0690239
s64579.1	0.0690065
OARX_51487346.1	0.0684806
OARX_118162943.1	0.0683848
OARX_109487401.1	0.0678421
s29291.1	0.0664045
OARX_102098117.1	0.0658117
s38854.1	0.0636519
OARX_22360871.1	0.062929
OARX_91649730.1	0.0628932
OARX_109200876.1	0.0625858
OARX_47252866.1	0.0617924
OARX_30265199.1	0.0612754
OARX_28451043_X.1	0.0609133
s33015.1	0.0607259
s28386.1	0.060001
s41698.1	0.0598077
s22678.1	0.0591538
OARX_112372010.1	0.0588328
OARX_106445652.1	0.0584995
OARX_111575175.1	0.0576264
OARX_122258807.1	0.0573414
OARX_24888669.1	0.0572427
s24801.1	0.0570142
s56175.1	0.0566645
OARX_84396258.1	0.055725
s09163.1	0.0549134
s18271.1	0.0546897
s12865.1	0.0546169
OARX_48593293.1	0.054501
OARX_38472141.1	0.053605
OARX_58690735.1	0.0533938
OARX_14669588.1	0.0532495
OARX_49585624.1	0.0532026
OARX_93917601.1	0.0531108
s10273.1	0.0524621
OARX_37621022.1	0.0518548
OARX_63114333.1	0.0517848
OARX_39685931.1	0.0513929
s42467.1	0.0486584
OARX_90873153.1	0.0482294
OARX_99054085_X.1	0.0481848
OARX_88695514.1	0.0475313
OARX_105818480.1	0.0471231
s45132.1	0.0468896
OARX_35497858.1	0.0459105
OARX_123816278.1	0.0458748
OARX_123908719.1	0.0449546
OARX_11703218.1	0.0445102
s63659.1	0.0444663
OARX_78415093.1	0.0441922
OARX_14104070.1	0.0434432
OARX_94139261.1	0.0422181
s61445.1	0.0421182
s71305.1	0.0417909
OARX_8997102_X.1	0.0417181
OARX_28418646_X.1	0.0414595
OARX_34005901.1	0.040692
OARX_121724022.1	0.0405211
OARX_120426901.1	0.0389647
s59231.1	0.0389647
OARX_88058957.1	0.0366567
OARX_28602407.1	0.0365885
OARX_28612369.1	0.0365885
s45757.1	0.0357141
OARX_73657722.1	0.035447
s38753.1	0.0351154
s40873.1	0.0350898
OARX_77428384.1	0.0341907
OARX_28961716.1	0.0329387
OARX_126323247.1	0.0326422
OARX_99182568.1	0.0326258
OARX_86633094.1	0.0315961
OARX_27143958.1	0.0315206
OARX_87324041.1	0.0313362
OARX_25777974.1	0.0309779
OARX_86777929.1	0.0307582
OARX_124609231.1	0.0301741
OARX_83876937.1	0.0281656
s11996.1	0.0274659
OARX_113078192.1	0.0267354
OARX_121652169.1	0.0261803
OARX_19013778.1	0.0260599
OARX_6082722_X.1	0.0258283
OARX_25197033.1	0.0257087
OARX_108555568.1	0.0254338
OARX_18218115.1	0.0246417
OARX_121589828.1	0.0239044
OARX_111306030.1	0.0232104
s39503.1	0.0230609
OARX_107236952.1	0.0230226
OARX_51976582.1	0.0226041
OARX_37921066.1	0.0216827
OARX_118887238.1	0.0215891
OARX_111386041.1	0.0211586
s55516.1	0.0203635
OARX_18718383.1	0.0202452
OARX_53703822.1	0.0198542
OARX_94549447.1	0.0198088
OARX_114161048.1	0.0189991
s18024.1	0.0183212
s71214.1	0.0181684
OARX_119727383.1	0.0177767
OARX_91430115.1	0.017672
OARX_42401514.1	0.0176234
OARX_21851884.1	0.0174277
OARX_21869827.1	0.0174277
s66300.1	0.0166282
OARX_126406510.1	0.0163118
OARX_72236232.1	0.0161177
OARX_121406229.1	0.0152224
OARX_74541037.1	0.0152103
OARX_93898942.1	0.015157
OARX_74923472.1	0.0147403
OARX_101340408.1	0.0146208
DU487488_662.1	0.0144682
s20530.1	0.0142058
OARX_45554550.1	0.0141913
s20460.1	0.013904
s30041.1	0.0138959
OARX_16784151.1	0.0137799
OARX_48374568.1	0.0121044
OARX_122638329.1	0.0114939
s19302.1	0.00938038
s23511.1	0.00817129
s11037.1	0.00785608
OARX_16070481.1	0.00736036
OARX_52608221.1	0.00450335
OARX_78152672.1	0.00446291
OARX_40233931.1	0.00403425
s69303.1	0.00267335
OARX_49002889.1	0.00238244
OARX_103137221.1	0.00231836
s18343.1	0.0013332
OARX_38528597.1	0.000189556
OARX_49564109.1	4.52e-05

## Sheet: Table S3
Table S3 Sunit each SNP iHS value
SNP name	iHS value
OARX_122339558.1	3.63711
OARX_40013563.1	3.44323
OARX_46956289.1	3.32286
OARX_75879873.1	3.30791
OARX_116773551.1	3.25894
OARX_114576371.1	3.23554
s19301.1	3.1822
s70544.1	3.10349
OARX_100307878.1	3.10186
s26335.1	3.08914
OARX_29118704.1	3.08461
s63588.1	3.05275
OARX_116794094.1	3.03753
OARX_108427445.1	2.96447
OARX_111386041.1	2.92422
OARX_108555568.1	2.75492
OARX_75897416.1	2.73033
OARX_75954534.1	2.69084
OARX_87841793.1	2.6748
OARX_43001119.1	2.64256
OARX_27060628.1	2.52632
OARX_45805494.1	2.51579
s32457.1	2.50618
OARX_39308630.1	2.44188
s29254.1	2.43077
OARX_124785484.1	2.42299
s07719.1	2.3742
DU365365_347.1	2.37266
OARX_121272018.1	2.36786
OARX_119932740_X.1	2.36417
OARX_29911993.1	2.36182
OARX_73629464.1	2.32663
OARX_103335459.1	2.32636
OARX_38309659.1	2.31838
OARX_47556312.1	2.28465
OARX_104101047.1	2.2654
OARX_101475197.1	2.24983
OARX_120893024.1	2.24254
OARX_52851975.1	2.24151
OARX_102654502.1	2.20306
OARX_111424482.1	2.18993
OARX_39393079.1	2.17438
DU428697_498.1	2.16998
OARX_38404244.1	2.16012
s39503.1	2.15184
OARX_39212838.1	2.14677
OARX_39956656.1	2.14422
OARX_40028377.1	2.10904
OARX_23489827.1	2.10772
OARX_38801624.1	2.08249
OARX_46842427.1	2.04935
OARX_48110587.1	2.04345
OARX_30312445.1	1.9998
s53403.1	1.94367
OARX_101561365.1	1.92283
OARX_75858603.1	1.89013
OARX_65525766.1	1.88684
OARX_47334694_X.1	1.87463
OARX_94139261.1	1.87377
OARX_78740611.1	1.86415
s27938.1	1.8565
s71112.1	1.84481
OARX_73014623.1	1.84025
s14505.1	1.80636
OARX_37621022.1	1.80154
OARX_40710286.1	1.77539
OARX_47672856.1	1.72147
OARX_47252866.1	1.71943
OARX_87951292.1	1.708
OARX_91172883.1	1.70592
s44107.1	1.70592
s06378.1	1.69805
OARX_65030113.1	1.63969
OARX_101233724.1	1.63467
OARX_40322359.1	1.63093
OARX_73717778.1	1.62987
OARX_38247415.1	1.62791
OARX_101330524.1	1.61865
OARX_102847527.1	1.61839
OARX_91326772.1	1.61256
s12123.1	1.60841
s38327.1	1.60046
s75700.1	1.5895
s48622.1	1.58695
OARX_83773452.1	1.5864
DU330424_111.1	1.56794
OARX_25153821.1	1.5637
OARX_111306030.1	1.54602
s37526.1	1.53505
OARX_87273449.1	1.50711
OARX_101587181.1	1.48391
OARX_91240608.1	1.47604
OARX_10909385.1	1.46842
OARX_37504418.1	1.4454
OARX_124092052.1	1.43981
OARX_55773697.1	1.42995
s17715.1	1.42922
OARX_63571789.1	1.42452
s15891.1	1.4177
OARX_14981939.1	1.40827
OARX_25481941.1	1.40674
s28386.1	1.39399
s05480.1	1.39395
OARX_10802557.1	1.39168
OARX_46889291.1	1.39085
OARX_90873153.1	1.37561
OARX_112600953.1	1.36694
s31310.1	1.36554
OARX_116844747.1	1.36239
OARX_122638329.1	1.3332
OARX_73686229.1	1.32769
OARX_43227227.1	1.30976
OARX_81674609.1	1.30529
OARX_111523132.1	1.26139
s42604.1	1.26014
DU276270_427.1	1.25805
s66303.1	1.24305
OARX_110420444_X.1	1.24035
OARX_11591314.1	1.22758
OARX_19806337.1	1.22494
OARX_102098117.1	1.22379
s50040.1	1.20477
OARX_114779008.1	1.1868
OARX_78903642.1	1.18517
OARX_66060588_X.1	1.1752
OARX_107304730.1	1.17427
OARX_87987834.1	1.16317
s45125.1	1.16098
s28984.1	1.15276
OARX_38528597.1	1.14489
OARX_27076240.1	1.13836
OARX_34195379.1	1.13752
s46003.1	1.12118
OARX_98622500.1	1.11241
s38490.1	1.10168
OARX_40121539.1	1.09899
OARX_22407231.1	1.09393
OARX_98047198.1	1.08812
s59173.1	1.08131
OARX_53225720.1	1.07173
OARX_48063847.1	1.06571
OARX_114352662.1	1.06544
OARX_22011518.1	1.0589
OARX_39345333.1	1.05777
OARX_98649121.1	1.04003
OARX_122522511.1	1.01708
s22753.1	1.01454
OARX_29249212.1	1.01031
OARX_77672346.1	1.00894
s21169.1	1.00054
OARX_88410255.1	0.984363
OARX_121716434.1	0.979758
OARX_113214394.1	0.971196
OARX_81857193.1	0.966743
OARX_102062645.1	0.966158
OARX_124733388.1	0.958267
OARX_107023858.1	0.952868
OARX_48653254.1	0.951201
OARX_95319840.1	0.947181
s38753.1	0.946638
OARX_126370692.1	0.944919
OARX_52405690.1	0.94181
OARX_121724022.1	0.933441
OARX_97352456.1	0.925389
OARX_78197954.1	0.925367
OARX_63707921.1	0.921545
s27905.1	0.904232
OARX_16784151.1	0.893446
OARX_29146959.1	0.890253
OARX_8203085.1	0.881103
s20530.1	0.877763
s49888.1	0.876235
OARX_85734914.1	0.871202
OARX_98758666.1	0.848076
OARX_42401514.1	0.836707
OARX_11703218.1	0.822035
s71214.1	0.818026
s63644.1	0.812279
s13796.1	0.80359
OARX_47769058.1	0.803032
s35782.1	0.802989
OARX_27398107.1	0.800802
OARX_116116277.1	0.796389
s54806.1	0.79374
OARX_20950879_X.1	0.785201
OARX_31607255.1	0.781995
s55080.1	0.773667
s26280.1	0.773448
OARX_74662147.1	0.770984
s74345.1	0.766562
OARX_103559964.1	0.766562
OARX_103609228.1	0.766562
OARX_116493570.1	0.764516
s44247.1	0.762289
OARX_28842785.1	0.753912
OARX_76572936.1	0.751082
OARX_77732488.1	0.747046
OARX_108639305.1	0.743676
OARX_73657722.1	0.738924
OARX_51829860.1	0.732929
OARX_91551152.1	0.731681
OARX_38701147.1	0.728662
OARX_118770487.1	0.727241
OARX_115093283.1	0.725786
s45030.1	0.725092
OARX_65208811.1	0.718498
OARX_45900764.1	0.705346
OARX_124402618.1	0.702868
OARX_112372010.1	0.691636
OARX_121589828.1	0.687659
DU225785_452.1	0.676615
OARX_78959608.1	0.675711
s61624.1	0.674416
OARX_42827832.1	0.673482
OARX_8095004.1	0.669771
OARX_109082678_X.1	0.667164
OARX_128836973.1	0.664034
s08251.1	0.659801
OARX_58424602.1	0.65521
s39817.1	0.653437
OARX_121778609.1	0.651744
OARX_38346902.1	0.651051
OARX_53695729.1	0.648662
OARX_74459953.1	0.646495
OARX_29830880.1	0.6453
OARX_38777888.1	0.635881
DU487488_662.1	0.634794
OARX_81017616.1	0.634408
OARX_11486431.1	0.63018
s45757.1	0.615965
OARX_124339688.1	0.614309
OARX_80686953.1	0.612965
OARX_48593293.1	0.608046
OARX_43066335.1	0.606706
s11286.1	0.60065
s25630.1	0.59655
OARX_72236232.1	0.594961
OARX_49002889.1	0.59202
OARX_42574947_X.1	0.586668
OARX_11233802.1	0.585753
OARX_38896560_X.1	0.584904
OARX_57792792.1	0.584309
s22678.1	0.579278
OARX_112464882.1	0.578533
OARX_14669588.1	0.577856
s47245.1	0.574194
OARX_39901562.1	0.573783
s20460.1	0.573015
OARX_10840799.1	0.569893
OARX_74042896.1	0.569498
OARX_91745643.1	0.567727
s24603.1	0.567598
OARX_10767975.1	0.559198
OARX_94549447.1	0.558047
OARX_10578530.1	0.557397
s19302.1	0.557184
OARX_10536833.1	0.555934
OARX_49135019.1	0.55221
s10416.1	0.547455
OARX_121652169.1	0.53928
OARX_84110445.1	0.533387
OARX_81713091.1	0.533281
OARX_93917601.1	0.532098
OARX_126323247.1	0.523243
OARX_74923472.1	0.522585
OARX_94104793.1	0.520713
OARX_82205212.1	0.516496
s47111.1	0.513685
OARX_25080774.1	0.510674
OARX_91845722.1	0.508435
s09163.1	0.507424
OARX_46123631.1	0.504903
s41047.1	0.503284
OARX_111190102.1	0.494142
OARX_102373562.1	0.49106
OARX_125084587.1	0.486246
s75715.1	0.485341
s38658.1	0.485164
OARX_49281832.1	0.483932
s27837.1	0.482767
OARX_28418646_X.1	0.480984
s69242.1	0.480813
OAR2_207144869.1	0.479802
OARX_106780979.1	0.479586
s69033.1	0.477908
OARX_47893170_X.1	0.472271
OARX_111349974.1	0.466566
OARX_28862933.1	0.464106
OARX_53703822.1	0.463757
OARX_82005367.1	0.462033
OARX_15558300.1	0.461567
DU179310_361.1	0.461278
s56930.1	0.45456
OARX_117997553_X.1	0.453496
OARX_82755160.1	0.451825
OARX_63240964.1	0.449894
OARX_50921852.1	0.449064
OARX_107821331.1	0.447915
OARX_25730959.1	0.445554
s72944.1	0.444569
OARX_115405200.1	0.444001
OARX_82738279.1	0.4349
OARX_56342973.1	0.424584
OARX_48493857.1	0.42366
OARX_107058174.1	0.423642
s46983.1	0.4185
OARX_43295474.1	0.416003
OARX_27576676.1	0.407004
OARX_111907035.1	0.40503
DU364592_286.1	0.404756
OARX_21374798.1	0.40031
s31031.1	0.399325
s57129.1	0.397884
OARX_16921240.1	0.395977
OARX_49303945.1	0.395937
s21331.1	0.393057
OARX_82679761.1	0.389599
OARX_81842153.1	0.387643
OARX_32010983.1	0.387219
s09625.1	0.386875
OARX_24255490.1	0.38684
s51310.1	0.386788
OARX_14749107.1	0.386136
OARX_85579388.1	0.381559
OARX_126406510.1	0.380243
OARX_115205577.1	0.378047
OARX_46792464.1	0.376246
OARX_120110524.1	0.374623
s63659.1	0.373474
OARX_76192158.1	0.368346
OARX_80520919.1	0.368339
OARX_14876499.1	0.368283
OARX_82237539.1	0.36777
s49278.1	0.366128
OARX_99054085_X.1	0.361319
s39146.1	0.359968
OARX_39570821_X.1	0.35964
s02621.1	0.357445
s23827.1	0.355435
OARX_93308477.1	0.352574
OARX_108776576.1	0.350183
OARX_110184293_X.1	0.348413
OARX_112416866.1	0.347
OARX_82902165.1	0.346582
OARX_75548381.1	0.344208
OARX_63611179.1	0.344098
OARX_117790873.1	0.343496
OARX_28932453.1	0.336
s36628.1	0.335777
OARX_85406306.1	0.334768
s75112.1	0.331925
OARX_88907191.1	0.330055
s43991.1	0.32988
OARX_123908719.1	0.32915
OARX_120373463.1	0.328508
s22255.1	0.326135
s06937.1	0.32014
OARX_31437911.1	0.31605
OARX_114805072.1	0.311271
s49643.1	0.31083
OARX_33843032.1	0.308011
OARX_30385723.1	0.302828
s01703.1	0.297448
OARX_121406229.1	0.296815
OARX_82499695.1	0.295103
OARX_91816958.1	0.291268
OARX_75087090.1	0.291182
s32336.1	0.290256
OARX_53932317.1	0.289063
OARX_85664346.1	0.283812
s44901.1	0.283179
OARX_78631468.1	0.274148
OARX_105905765.1	0.27395
OARX_87058315.1	0.272762
OARX_74419004.1	0.272368
OARX_42803740.1	0.271383
OARX_121809968.1	0.270753
OARX_30541022_X.1	0.269771
OARX_107941501.1	0.266741
s10273.1	0.262837
OARX_51294776.1	0.262062
OARX_109181441.1	0.258579
OARX_110496762.1	0.25786
OARX_19780103.1	0.25243
OARX_117569024.1	0.250274
OARX_15909775.1	0.248327
OARX_112321655.1	0.248255
OARX_109922971.1	0.247114
OARX_10672687.1	0.246034
s52126.1	0.245797
OARX_99182568.1	0.245505
OARX_25614788.1	0.245018
s21022.1	0.243769
s41277.1	0.241047
s21042.1	0.237967
OARX_102996728.1	0.236147
s26339.1	0.234451
OARX_31247483.1	0.23443
OARX_24888669.1	0.23193
s64293.1	0.230656
OARX_85386153.1	0.228918
OARX_42340942.1	0.227167
OARX_83642813.1	0.226905
s53196.1	0.225399
OARX_40992335.1	0.224201
OARX_77318524.1	0.222614
OARX_122314303.1	0.221699
OARX_38431131.1	0.218926
OARX_125130516.1	0.213939
OARX_85483846.1	0.211009
s13516.1	0.209856
OARX_84195922.1	0.209648
s28564.1	0.207627
OARX_105162278.1	0.201842
s41440.1	0.19838
s74637.1	0.198278
OARX_117671978.1	0.194128
OARX_122134724.1	0.191737
OARX_94504309.1	0.19159
OARX_110234399.1	0.189915
s26936.1	0.189484
s26134.1	0.188532
OARX_54412853.1	0.183706
OARX_110276633.1	0.182491
s40094.1	0.178578
OARX_10965528.1	0.174406
OARX_120573426.1	0.173971
OARX_103137221.1	0.173144
s72987.1	0.171689
OARX_84338138.1	0.167677
s29064.1	0.16687
OARX_39685931.1	0.16603
OARX_21736548.1	0.162986
OARX_84396258.1	0.162922
s26403.1	0.161789
OARX_48941479.1	0.160901
OARX_93669308.1	0.158319
OARX_22733191.1	0.154177
OARX_107236952.1	0.149387
OARX_25431652.1	0.146734
OARX_26036045.1	0.14659
OARX_38472141.1	0.144569
OARX_11175000.1	0.143615
OARX_72985145.1	0.141304
OARX_102920566.1	0.140055
OARX_114537909_X.1	0.139834
OARX_71592298.1	0.137505
OARX_109619990.1	0.137435
OAR23_48530053.1	0.137164
s61445.1	0.135473
s50692.1	0.135039
s51128.1	0.130699
s66300.1	0.12782
OARX_118061045.1	0.125148
s34732.1	0.124675
OARX_106722016.1	0.124573
s29953.1	0.124108
DU498640_321.1	0.121838
OARX_82254766.1	0.121647
s26005.1	0.118771
OARX_11260093.1	0.113717
OARX_53649799.1	0.112127
s53538.1	0.112127
s09194.1	0.111349
OARX_28612369.1	0.108537
s56924.1	0.10842
OARX_46572093.1	0.106993
s05978.1	0.106156
OARX_40933614.1	0.100155
OARX_19024316.1	0.0990528
OARX_89022750.1	0.0970024
OARX_84149219.1	0.095686
s23511.1	0.0940014
OARX_109443858.1	0.0937603
s37539.1	0.0931093
OARX_18718383.1	0.0920398
OARX_8814349.1	0.0911156
OARX_124978161.1	0.0891532
OARX_119492809.1	0.0886872
OARX_26231414.1	0.0858063
s75871.1	0.0856112
s06926.1	0.0840788
s39212.1	0.08389
OARX_23062957.1	0.0810085
s05550.1	0.078665
s75962.1	0.0785545
OARX_117647840_X.1	0.0765522
OARX_49416451.1	0.0739529
OARX_102576796.1	0.0736606
s24801.1	0.0728823
OARX_16099179.1	0.07183
OARX_105101318.1	0.0697929
OARX_109200876.1	0.0685972
s69605.1	0.0683779
OARX_6082722_X.1	0.0678577
OARX_88058957.1	0.0672802
OARX_14822231.1	0.0668235
OARX_120155115.1	0.0665755
OARX_122489052.1	0.0631315
OARX_119235356.1	0.0631215
OARX_11655327.1	0.0628566
s61416.1	0.0615355
OARX_64628601.1	0.0572034
OARX_93384200.1	0.0555384
s42190.1	0.0554587
s09170.1	0.0550868
s10736.1	0.0542431
OARX_35208552.1	0.0535529
OARX_75975749.1	0.0530248
s38854.1	0.0528779
OARX_92007136.1	0.0488371
OARX_11088122.1	0.0477191
OARX_11161852.1	0.0437811
s35774.1	0.0418187
s12906.1	0.0387316
OARX_79448969.1	0.0370675
s29291.1	0.0358905
OARX_120409273.1	0.0356261
OARX_22137336.1	0.0325925
OARX_74277156.1	0.0314487
s12092.1	0.0278024
OARX_75257260.1	0.0255298
OARX_25197033.1	0.0253105
OARX_34048710.1	0.0243087
OARX_67322374.1	0.0234511
s31917.1	0.0208758
OARX_79152365.1	0.0160795
s60734.1	0.0159315
OARX_109545230.1	0.0141314
OARX_15615564.1	0.0132336
DU450886_629.1	0.00855235
OARX_16070481.1	0.00713413
s44428.1	0.00570872
s11827.1	0.00549075
OARX_118162943.1	0.00365164
OARX_11127459.1	0.00355953
OARX_87324041.1	0.00313247
OARX_119423593.1	-0.00374183
OARX_109487401.1	-0.00395577
OARX_124970841.1	-0.0102559
s10919.1	-0.0106833
OARX_21677876.1	-0.013102
OARX_86633094.1	-0.0186095
OARX_113174546.1	-0.0202942
DU211594_392.1	-0.0243655
OARX_27752501.1	-0.0248321
s45612.1	-0.0262575
OARX_42837583.1	-0.028156
OARX_108965768.1	-0.0308823
OARX_8657405_X.1	-0.0323749
OARX_28961716.1	-0.0352199
OARX_25020500.1	-0.0372072
OARX_106555138.1	-0.0384671
OARX_14214233.1	-0.0386274
OARX_123983913.1	-0.0394066
s32655.1	-0.0402862
s18434.1	-0.0417278
OARX_84431875.1	-0.044796
OARX_114489693.1	-0.0452854
OARX_27524192.1	-0.0499798
s51129.1	-0.0510648
OARX_46703391.1	-0.0520415
s54349.1	-0.0571859
OARX_26091319.1	-0.0576275
OARX_57905305.1	-0.0582681
OARX_78222056.1	-0.0584004
s52811.1	-0.0591747
s17168.1	-0.060208
s01718.1	-0.0605186
OARX_8267269.1	-0.0618313
OARX_102620828.1	-0.0649902
OARX_86516113.1	-0.0653295
OARX_42467421.1	-0.0656902
DU240765_244.1	-0.0673818
OARX_25777974.1	-0.0687909
OARX_23931458.1	-0.0706161
OARX_65098948.1	-0.0706684
OARX_107637867.1	-0.072233
OARX_110838676.1	-0.0726385
OARX_106888543.1	-0.0728643
s62013.1	-0.0730587
OARX_119727383.1	-0.0783826
OARX_120426901.1	-0.0801783
s12053.1	-0.0801901
OARX_120706037.1	-0.0816508
OARX_109845023.1	-0.08191
OARX_14005468.1	-0.0820731
OARX_31311031.1	-0.0840675
s18343.1	-0.0843125
OARX_53514671.1	-0.0846852
OARX_19707716.1	-0.0851839
s50909.1	-0.0851856
OARX_86777929.1	-0.0875527
OARX_79396841.1	-0.0893158
OARX_16878309.1	-0.0945543
OARX_84464739.1	-0.0951891
OARX_16568246.1	-0.0974207
OARX_84212352_X.1	-0.105239
s13231.1	-0.105419
s18271.1	-0.106897
OARX_11293420_X.1	-0.108317
OARX_94381187.1	-0.109823
s18024.1	-0.11059
OARX_31537208.1	-0.112024
s40966.1	-0.112585
OARX_102961116.1	-0.112812
OARX_120856179.1	-0.114967
s03694.1	-0.115116
OARX_120562732.1	-0.115597
OARX_14396780.1	-0.117377
OARX_62844884.1	-0.118737
OARX_102676774.1	-0.123265
s26116.1	-0.124105
OARX_18553357.1	-0.130653
OARX_7998478.1	-0.131187
OARX_99017056.1	-0.135582
OARX_67423871.1	-0.141056
s19711.1	-0.141522
OARX_119953271.1	-0.14232
s61601.1	-0.143091
OARX_51487346.1	-0.145787
OARX_81029058.1	-0.148901
s08752.1	-0.149545
OARX_78232119.1	-0.149813
OARX_55032299.1	-0.149917
s50831.1	-0.151752
OARX_28886935.1	-0.15268
OARX_105754749.1	-0.153572
OARX_110792720.1	-0.156293
s73460.1	-0.156458
OARX_72822977.1	-0.157426
OARX_113453324.1	-0.161376
OARX_104184983.1	-0.162903
s32144.1	-0.162903
OARX_35237878.1	-0.16309
OARX_78696595.1	-0.163901
OARX_77428384.1	-0.165131
s38728.1	-0.165869
s12140.1	-0.168897
OARX_121157013.1	-0.16911
OARX_125571053.1	-0.16928
s41053.1	-0.172008
OARX_101512543.1	-0.172662
OARX_16041606.1	-0.175561
s38239.1	-0.175827
OARX_31599682.1	-0.176565
OARX_28451043_X.1	-0.177884
s03197.1	-0.178044
s35549.1	-0.180593
OARX_121995198.1	-0.181318
OARX_105818480.1	-0.183552
OARX_9037102.1	-0.18672
OARX_124609231.1	-0.186763
s32042.1	-0.188323
s07429.1	-0.18845
OARX_82943742.1	-0.190239
OARX_108789735.1	-0.192763
OARX_77758767.1	-0.194931
s44053.1	-0.196045
DU199514_430.1	-0.196595
OARX_14861261.1	-0.199076
OARX_22199486.1	-0.201316
s07963.1	-0.204194
OARX_83911613.1	-0.204814
s59821.1	-0.205704
OARX_30456682.1	-0.211519
OARX_120658270.1	-0.214008
OARX_87598993.1	-0.218799
OARX_124698743.1	-0.223609
OARX_107723746.1	-0.224051
DU435115_188.1	-0.225974
OARX_61843689.1	-0.227285
OARX_22620616.1	-0.227734
OARX_110594072.1	-0.228681
s45132.1	-0.234257
s29949.1	-0.238312
OARX_114129627_X.1	-0.23891
s59231.1	-0.242568
OARX_45554550.1	-0.24478
OARX_14382090.1	-0.245902
OARX_11337494.1	-0.250199
s16893.1	-0.251053
OARX_119405720.1	-0.251469
OARX_77931764.1	-0.252787
OARX_18967005.1	-0.253695
OARX_46551013.1	-0.255163
OARX_95154058.1	-0.258166
OARX_63114333.1	-0.262148
OARX_63276879.1	-0.262672
s06458.1	-0.263102
OARX_18218115.1	-0.264873
s21099.1	-0.266507
OARX_26259689.1	-0.270693
OARX_86601934.1	-0.27241
OARX_74541037.1	-0.272815
OARX_76459539.1	-0.275985
OARX_31484840.1	-0.28207
OARX_110941776.1	-0.282679
s48591.1	-0.284253
OARX_25389769.1	-0.287732
s20995.1	-0.288103
OARX_53305527.1	-0.29016
s47072.1	-0.291634
s43972.1	-0.292167
s36336.1	-0.293973
s02716.1	-0.294149
OARX_64137688.1	-0.295291
OARX_73769365.1	-0.301618
OARX_125516668.1	-0.301634
s59791.1	-0.302852
OARX_25892929.1	-0.306541
OARX_40911514.1	-0.309725
OARX_82650389.1	-0.315754
OARX_51020466.1	-0.316761
OARX_78982967.1	-0.320293
OARX_88915058.1	-0.322002
OARX_5854800_X.1	-0.32322
OARX_48129885.1	-0.325316
s30041.1	-0.325328
OARX_50862265.1	-0.328791
OARX_29188769.1	-0.331021
s17025.1	-0.331459
OARX_118887238.1	-0.336213
OARX_58690735.1	-0.340344
OARX_108855097.1	-0.341616
OARX_86548894.1	-0.342927
s33410.1	-0.343078
s22414.1	-0.343419
s72924.1	-0.346258
OARX_122403019.1	-0.350796
s64486.1	-0.357185
OARX_105885515.1	-0.361754
OARX_128945275.1	-0.365494
OARX_22662256.1	-0.365954
s05401.1	-0.366091
OARX_32005669.1	-0.36761
s74057.1	-0.371205
OARX_104212127.1	-0.372272
OARX_48392113.1	-0.372451
s04099.1	-0.374241
OARX_129007775.1	-0.376184
OARX_122571365.1	-0.376599
s10893.1	-0.381891
OARX_119702496.1	-0.383369
OARX_76389260.1	-0.387072
OARX_8907381.1	-0.38821
OARX_124109117.1	-0.389001
s26041.1	-0.39167
s70693.1	-0.392241
s48236.1	-0.392408
OARX_19833738.1	-0.393717
OARX_113525578.1	-0.394318
OARX_83876937.1	-0.394808
OARX_11374295.1	-0.397798
OARX_86468715_X.1	-0.39809
OARX_82849213.1	-0.400566
OARX_17003361.1	-0.401738
OARX_26968286.1	-0.402848
s17903.1	-0.403591
OARX_106502295.1	-0.408089
OARX_31663546.1	-0.411886
OARX_72948383.1	-0.413898
OARX_65001221.1	-0.42247
s66286.1	-0.424648
OARX_123880994.1	-0.424732
OARX_121598412.1	-0.429372
OARX_122258807.1	-0.433796
s57473.1	-0.437088
OARX_66123878.1	-0.443639
OARX_21851884.1	-0.445738
OARX_21869827.1	-0.445738
s11037.1	-0.446962
s42467.1	-0.447855
OARX_43335176.1	-0.451089
OARX_97818989.1	-0.456685
s64579.1	-0.457904
250506CS3900539000001_471.1	-0.458595
OARX_82418640.1	-0.459324
s29067.1	-0.46818
OARX_119825699_X.1	-0.474001
OARX_11393124.1	-0.475725
OARX_52789083.1	-0.482307
OARX_115792016.1	-0.48231
OARX_111110978.1	-0.490766
OARX_124202789.1	-0.497205
DU383316_402.1	-0.499393
s20869.1	-0.506162
OARX_90978320.1	-0.508577
OARX_114431127.1	-0.516843
OARX_52977852.1	-0.518693
OARX_45655473.1	-0.524502
OARX_114054710.1	-0.5276
s53551.1	-0.52774
OARX_106976757.1	-0.530056
OARX_15341607.1	-0.538295
OARX_15353072.1	-0.538295
OARX_30265199.1	-0.543533
OARX_43149441.1	-0.547384
s17468.1	-0.547478
OARX_107094834.1	-0.548194
s29549.1	-0.557192
s54765.1	-0.561062
OARX_103999250.1	-0.563042
s65847.1	-0.57039
s36498.1	-0.570809
OARX_81807292.1	-0.571334
s24415.1	-0.574685
OARX_88665373.1	-0.577644
OARX_88646756.1	-0.578974
OARX_33986060.1	-0.580187
s69303.1	-0.581012
OARX_115767547.1	-0.5816
s11996.1	-0.581873
OARX_124847482.1	-0.582602
OARX_75135131.1	-0.583675
s71283.1	-0.584336
OARX_81758554.1	-0.591578
OARX_91649730.1	-0.596086
s32659.1	-0.598207
OARX_121839918.1	-0.599753
OARX_86525480.1	-0.605301
OARX_87506790.1	-0.607417
OARX_34005901.1	-0.607581
s30030.1	-0.611315
s05185.1	-0.616069
s10353.1	-0.61738
OARX_31838440.1	-0.618263
OARX_49045095.1	-0.618983
OARX_56302763.1	-0.62027
OARX_124587487.1	-0.629995
s67468.1	-0.640685
OARX_98312534.1	-0.64184
OARX_25770728.1	-0.6517
OARX_27289624.1	-0.659311
s00084.1	-0.662718
s64012.1	-0.666638
OARX_72351736.1	-0.672278
OARX_106812901.1	-0.672853
OARX_19681917.1	-0.679549
OARX_83698455.1	-0.68051
OARX_33804882.1	-0.684829
OARX_125711423_X.1	-0.691709
DU515244_528.1	-0.695263
s33015.1	-0.709818
OARX_88695514.1	-0.716562
OARX_8948859.1	-0.720532
s68662.1	-0.729135
OARX_29022612.1	-0.739819
OARX_78028955.1	-0.751861
OARX_106495830.1	-0.778007
s25326.1	-0.780107
OARX_95372410.1	-0.780609
OARX_29226488.1	-0.785827
s18515.1	-0.786825
s15738.1	-0.791579
OARX_116737201.1	-0.79382
OARX_30397866.1	-0.801568
OARX_28602407.1	-0.801659
OARX_72263548.1	-0.806643
s43859.1	-0.807364
OARX_113373957.1	-0.813878
OARX_121076593.1	-0.821554
s50907.1	-0.843158
s74614.1	-0.847262
OARX_113305737.1	-0.863625
DU492411_505.1	-0.867056
OARX_112805650.1	-0.877239
OARX_93898942.1	-0.881959
OARX_126170081.1	-0.884289
OARX_26418059.1	-0.886545
OARX_27593383_X.1	-0.898399
OARX_110738281.1	-0.902496
s17179.1	-0.909576
OARX_112404834.1	-0.911245
OARX_52608221.1	-0.916641
OARX_27484186.1	-0.919433
s61050.1	-0.930199
OARX_8997102_X.1	-0.938873
OARX_37921066.1	-0.944983
OARX_37969851.1	-0.944983
OARX_115080641.1	-0.959953
OARX_102259548.1	-0.973081
s55516.1	-0.980132
OARX_119510626.1	-0.980685
OARX_82566242.1	-0.991923
OARX_119762219.1	-0.995454
s71744.1	-0.998932
s10517.1	-1.00978
OARX_87726916.1	-1.01277
OARX_115528761.1	-1.01341
OARX_123816278.1	-1.01931
s17286.1	-1.0356
OARX_108993743.1	-1.03622
s29729.1	-1.03821
s47155.1	-1.0459
s21669.1	-1.05168
OARX_38201398.1	-1.05716
OARX_123769039.1	-1.05897
s15257.1	-1.09287
OARX_40233931.1	-1.09469
s58259.1	-1.09517
OARX_88266152.1	-1.11122
OARX_101276703.1	-1.11461
OARX_126032756.1	-1.14814
OARX_79350656.1	-1.14876
OARX_61737376.1	-1.14914
OARX_61745327.1	-1.14914
s30825.1	-1.1578
OARX_77492598.1	-1.16736
OARX_116055833.1	-1.16895
OARX_114693376.1	-1.17727
OARX_25296412.1	-1.18637
s10157.1	-1.18926
OARX_10602383.1	-1.19657
OARX_86280642.1	-1.2011
OARX_123999513.1	-1.25921
OARX_6901932.1	-1.26686
s40873.1	-1.28636
OARX_97709391.1	-1.30789
OARX_115311000.1	-1.31383
OARX_39147901.1	-1.33602
OARX_29948603.1	-1.34334
OARX_106445652.1	-1.36218
OARX_128881696.1	-1.39062
s70954.1	-1.39299
OARX_38618108.1	-1.41049
OARX_98701611.1	-1.42382
OARX_124453154.1	-1.44234
s71449.1	-1.45859
OARX_48374568.1	-1.46547
OARX_30491298_X.1	-1.4693
s60331.1	-1.47982
s34323.1	-1.53502
OARX_49091839.1	-1.64408
OARX_90906078.1	-1.65282
OARX_53985636.1	-1.68397
OARX_101340408.1	-1.70209
s29524.1	-1.70871
OARX_14104070.1	-1.71087
OARX_77450647.1	-1.73193
OARX_47341177.1	-1.73701
OARX_27316457_X.1	-1.74726
s54281.1	-1.77798
OARX_121307417.1	-1.78122
s56175.1	-1.84962
OARX_56195013.1	-1.86408
OARX_108475651.1	-1.87429
OARX_31883742.1	-1.95613
OARX_113274860.1	-1.98583
s32665.1	-1.99976
OARX_19939180.1	-2.01556
s50055.1	-2.0178
OARX_81899362.1	-2.04209
OARX_118724712.1	-2.08865
OARX_94234233.1	-2.09431
OARX_25473829.1	-2.17581
OARX_123732583.1	-2.19053
OARX_83760443.1	-2.20274
OARX_110992791.1	-2.21351
OARX_116720248.1	-2.25306
s34020.1	-2.26886
OARX_94349054.1	-2.29974
s34139.1	-2.31183
OARX_97737734.1	-2.3386
s17709.1	-2.35786
OARX_82456134.1	-2.37326
OARX_40762309.1	-2.47504
OARX_73028561.1	-2.54953
OARX_91212655.1	-2.62347
OARX_98549010.1	-2.63395
OARX_119370187.1	-2.64989
OARX_49351860.1	-2.69966
OARX_16421483.1	-2.70549
OARX_33849288.1	-3.0199
s56097.1	-3.45426
s04229.1	-3.45444
OARX_14057975.1	-3.4984
OARX_19013778.1	-3.50125
OARX_38965990.1	-3.50628
OARX_42676383.1	-3.53884
OARX_79293639.1	-3.5659
s05322.1	-3.61707
DU275403_434.1	-3.68957
OARX_102028326.1	-3.70127
OARX_125632426.1	-3.70879
s15552.1	-3.96541
OARX_108414989.1	-4.01827
OARX_103524806.1	-4.06637
OARX_91430115.1	-4.07459
OARX_114953976.1	-4.21199
OARX_23992544.1	-4.29111
OARX_46276607.1	-4.55007
OARX_107298804.1	-4.58292
OARX_74828607.1	-4.84863

## Sheet: Table S4
Table S4 each SNP Fst value
SNP name	Fst value
s38490.1	0.705285
OARX_77492598.1	0.640898
OARX_49700805.1	0.640864
OARX_106976757.1	0.630735
OARX_58424602.1	0.597297
OARX_95319840.1	0.595544
s53403.1	0.58563
OARX_77428384.1	0.583203
OARX_71592298.1	0.579672
s47111.1	0.573207
OARX_87324041.1	0.57311
OARX_105010088.1	0.569791
OARX_105029577.1	0.569791
OARX_53514671.1	0.562509
s53538.1	0.562509
s51310.1	0.560652
OARX_106812901.1	0.560652
s12906.1	0.56004
OARX_123880994.1	0.553298
s16473.1	0.553167
s17168.1	0.551648
OARX_98505111_X.1	0.55128
OARX_103335459.1	0.550148
OARX_11655327.1	0.547913
OARX_112080360.1	0.547446
OARX_77318524.1	0.546468
OARX_106722016.1	0.546021
s75962.1	0.542664
OARX_103137221.1	0.541386
OARX_75257260.1	0.54049
s37539.1	0.536169
OARX_31663546.1	0.53457
s32659.1	0.529151
OARX_121652169.1	0.528125
OARX_25730959.1	0.527824
s39837.1	0.524849
OARX_28682429.1	0.524849
OARX_95372410.1	0.522658
OARX_124109117.1	0.519107
OARX_53649799.1	0.518625
OARX_23489827.1	0.517737
OARX_109825816.1	0.515378
s10517.1	0.513505
OARX_59194976.1	0.512164
OARX_47252866.1	0.510176
OARX_52405690.1	0.507211
s74345.1	0.504869
OARX_103559964.1	0.504869
OARX_103609228.1	0.504869
s02385.1	0.502041
OARX_28842785.1	0.500786
DU492411_505.1	0.499305
OARX_120856179.1	0.498802
OARX_51829860.1	0.498634
s35549.1	0.496661
s45125.1	0.492108
s26339.1	0.491981
OARX_121724022.1	0.488622
s06965.1	0.487876
s55516.1	0.485653
OARX_47672856.1	0.485169
OARX_122522511.1	0.482566
s50831.1	0.481176
OARX_105162278.1	0.481139
OARX_108965768.1	0.479919
OARX_87110835.1	0.478425
OARX_121589828.1	0.47445
OARX_121598412.1	0.47445
s38239.1	0.473237
OARX_38939916.1	0.472345
OARX_39001399.1	0.472345
OARX_82319638.1	0.469454
OARX_45554550.1	0.466826
s29549.1	0.464039
OARX_102062645.1	0.460938
s39212.1	0.45993
s31052.1	0.45987
s45612.1	0.458383
OARX_101561365.1	0.45834
s20995.1	0.457787
OARX_102654502.1	0.456974
OARX_112754622.1	0.45676
OARX_107127374.1	0.45631
OARX_107236952.1	0.455531
OARX_97818989.1	0.454278
OARX_58238477.1	0.454191
s23511.1	0.450128
OARX_31607255.1	0.449081
OARX_59327581.1	0.445268
OARX_59383635.1	0.445268
OARX_59578440.1	0.445268
OARX_107023858.1	0.444387
OARX_6082722_X.1	0.443527
OARX_24255490.1	0.443183
OARX_115665260.1	0.443146
OARX_16921240.1	0.442867
OARX_102676774.1	0.440046
OARX_72263548.1	0.439636
OARX_103999250.1	0.439169
OARX_37621022.1	0.438515
OARX_75087090.1	0.438449
OARX_102896730.1	0.438245
OARX_125084587.1	0.43759
s05322.1	0.437229
s18343.1	0.436574
s06458.1	0.435835
OARX_30456682.1	0.433629
OARX_75858603.1	0.433306
OARX_75879873.1	0.433306
OARX_75897416.1	0.433306
OARX_75954534.1	0.433306
OARX_39032919.1	0.431862
s08752.1	0.431862
OARX_117647840_X.1	0.427873
OARX_120562732.1	0.427621
OARX_114322593.1	0.425686
s17715.1	0.424605
OARX_79152365.1	0.424237
OARX_76354330.1	0.424209
s61445.1	0.422993
OARX_22011518.1	0.420924
s68662.1	0.417757
OARX_31247483.1	0.416333
OARX_105101318.1	0.416307
s24603.1	0.414585
OARX_14981939.1	0.414072
OARX_15353072.1	0.412185
OARX_51294776.1	0.410341
OARX_78616287.1	0.408587
s61050.1	0.408207
OARX_123816278.1	0.406709
OARX_86601934.1	0.406593
s58259.1	0.405632
s12140.1	0.402704
s26280.1	0.402184
OARX_42574947_X.1	0.401244
OARX_28961716.1	0.40003
OARX_110738281.1	0.399154
s24415.1	0.398852
OARX_46792464.1	0.398634
OARX_84149219.1	0.398186
OARX_116116277.1	0.397556
OARX_105936332.1	0.396532
s22255.1	0.394836
OARX_16012715.1	0.392407
s10416.1	0.390649
OARX_65098948.1	0.388723
s75871.1	0.387162
OARX_43066335.1	0.386637
s10919.1	0.385737
OARX_120426901.1	0.385536
s34323.1	0.385206
OARX_98312534.1	0.384923
OARX_98350315.1	0.384923
OARX_74042896.1	0.383963
OARX_98843759.1	0.383384
s26403.1	0.381885
OARX_60264325.1	0.381423
s38079.1	0.381423
s46450.1	0.380869
OARX_49416451.1	0.378495
OARX_49303945.1	0.378364
OARX_81112725.1	0.377565
OARX_102961116.1	0.376378
OARX_102996728.1	0.376378
OARX_82064889.1	0.375638
OARX_78903642.1	0.373242
s50909.1	0.372402
OARX_73717778.1	0.372237
OARX_16878309.1	0.372091
s26335.1	0.370663
OARX_101330524.1	0.370633
OARX_10909385.1	0.368718
OARX_84195922.1	0.368335
OARX_28886935.1	0.36735
s33410.1	0.36714
OARX_58569265_X.1	0.367024
s04099.1	0.36694
OARX_116493570.1	0.365024
OARX_77450647.1	0.364073
OARX_11591314.1	0.363138
OARX_53695729.1	0.36185
OARX_58608882.1	0.361163
OARX_86525480.1	0.360756
s20530.1	0.359071
OARX_61737376.1	0.358607
OARX_61745327.1	0.358607
OARX_87951292.1	0.35817
OARX_118724712.1	0.357601
OARX_106555138.1	0.356659
s18271.1	0.356481
s57473.1	0.354799
OARX_9037102.1	0.354687
OARX_119405720.1	0.35412
OARX_48771740.1	0.35346
OARX_72822977.1	0.353097
OARX_112404834.1	0.352965
OARX_65037918.1	0.352873
OARX_116794094.1	0.352263
OARX_101587181.1	0.351764
OARX_99054085_X.1	0.351545
OARX_37921066.1	0.351346
OARX_39308630.1	0.350972
OARX_75135131.1	0.350907
OARX_98758666.1	0.350558
OARX_102847527.1	0.350521
OARX_101276703.1	0.350087
OARX_16041606.1	0.348447
OARX_63611179.1	0.346082
OARX_27316457_X.1	0.344515
s37526.1	0.343526
DU498640_321.1	0.34279
s37016.1	0.342273
OARX_102098117.1	0.342019
OARX_88915058.1	0.341515
OAR2_207144869.1	0.341326
s39817.1	0.340709
OARX_86516113.1	0.33964
OARX_45718836.1	0.339296
OARX_30491298_X.1	0.338347
OARX_45805494.1	0.338249
OARX_11127459.1	0.337797
OARX_73657722.1	0.336082
OARX_121778609.1	0.33534
OARX_72985145.1	0.335248
s66695.1	0.334498
OARX_25777974.1	0.333993
OARX_46703391.1	0.333694
s04229.1	0.331589
OARX_104184983.1	0.331136
s32144.1	0.331136
s18024.1	0.330745
s31031.1	0.329652
s64486.1	0.328936
OARX_77672346.1	0.328486
OARX_99017056.1	0.326126
OARX_72236232.1	0.324837
s44428.1	0.323398
s11996.1	0.323247
s59791.1	0.322687
s60734.1	0.321766
s41053.1	0.319066
s75700.1	0.318296
OARX_53305527.1	0.318296
OARX_28602407.1	0.318176
OARX_49091839.1	0.31813
OARX_65525766.1	0.318127
OARX_102259548.1	0.316438
s27938.1	0.316434
OARX_11486431.1	0.316123
OARX_52977852.1	0.315627
DU211594_392.1	0.314935
OARX_47893170_X.1	0.31336
OARX_104212127.1	0.311825
s55080.1	0.311695
s39146.1	0.311466
s52811.1	0.309906
s35774.1	0.309678
OARX_114054710.1	0.309442
s15891.1	0.309051
OARX_23992544.1	0.308394
OARX_29146959.1	0.307823
OARX_106888543.1	0.307406
OARX_117997553_X.1	0.30676
OARX_16070481.1	0.305785
s25326.1	0.304588
OARX_98622500.1	0.30411
OARX_43335176.1	0.302912
OARX_90978320.1	0.302728
s44372.1	0.302537
OARX_19643590.1	0.301225
OARX_76459539.1	0.30089
OARX_77732488.1	0.300687
s30041.1	0.300497
OARX_58690735.1	0.299766
OARX_114100188.1	0.297553
OARX_49351860.1	0.295843
OARX_83911613.1	0.294988
OARX_117613328.1	0.2944
OARX_49002889.1	0.293109
s69303.1	0.292645
OARX_76389260.1	0.288784
OARX_106614691.1	0.288575
s69033.1	0.287427
s17903.1	0.287042
OARX_87058315.1	0.286791
OARX_39540727.1	0.286663
OARX_72351736.1	0.286262
s34732.1	0.286243
s45030.1	0.285407
s10273.1	0.28532
OARX_42827832.1	0.283486
s02716.1	0.283411
OARX_123769039.1	0.283267
OARX_116773551.1	0.281713
OARX_48129885.1	0.281559
OARX_6901932.1	0.280612
OARX_109181441.1	0.279964
OARX_8814349.1	0.279805
OARX_66123878.1	0.279311
OARX_64137688.1	0.278247
OARX_112372010.1	0.277834
OARX_103255437.1	0.277122
OARX_33849288.1	0.276954
OARX_119461444.1	0.275416
OARX_16106124.1	0.275079
OARX_22137336.1	0.275053
OARX_98549010.1	0.274648
s26005.1	0.274365
OARX_7998478.1	0.273859
OARX_108639305.1	0.273546
OARX_31311031.1	0.272522
s29949.1	0.272069
s13516.1	0.271057
OARX_98047198.1	0.270857
OARX_112416866.1	0.270611
OARX_113453324.1	0.269921
OARX_101943300.1	0.269705
OARX_116720248.1	0.268747
OARX_27484186.1	0.268205
OARX_11161852.1	0.267648
s10736.1	0.266312
OARX_103378386.1	0.265995
OARX_34005901.1	0.26585
OARX_108658625.1	0.265558
OARX_51842287.1	0.26547
OARX_45912356.1	0.262566
DU365365_347.1	0.26249
OARX_73769365.1	0.261821
OARX_119762219.1	0.261645
OARX_122638329.1	0.261508
OARX_38472141.1	0.261493
OARX_21736548.1	0.261209
OARX_116737201.1	0.260915
s71037.1	0.260645
OARX_82738279.1	0.259861
OARX_25770728.1	0.259348
OARX_87506790.1	0.259099
OARX_25080774.1	0.258935
OARX_85534087.1	0.25852
OARX_81758554.1	0.25821
s22441.1	0.257538
OARX_19833738.1	0.256753
s75715.1	0.256416
OARX_117671978.1	0.253805
s32336.1	0.253662
OARX_39393079.1	0.25227
OARX_38729534.1	0.251654
s57247.1	0.251566
OARX_106502295.1	0.251531
s39064.1	0.251363
OARX_113274860.1	0.250974
s29729.1	0.249808
OARX_105754749.1	0.249808
OARX_48593293.1	0.249441
OARX_81674609.1	0.249247
OARX_112464882.1	0.248962
OARX_47334694_X.1	0.248292
OARX_126032756.1	0.248134
OARX_105885515.1	0.247991
OARX_49519450.1	0.247883
s51128.1	0.247824
OARX_125318332.1	0.247572
OARX_27289624.1	0.246927
OARX_124609231.1	0.246794
OARX_87987834.1	0.246714
OARX_15658171.1	0.245936
OARX_125309932.1	0.245454
OARX_78631468.1	0.244796
OARX_40233931.1	0.2446
OARX_10578530.1	0.24453
OARX_125516668.1	0.244017
OARX_110184293_X.1	0.24357
OARX_18553357.1	0.243506
OARX_119702496.1	0.243491
OARX_16421483.1	0.242269
OARX_46097533.1	0.241322
OARX_10672687.1	0.241228
s56924.1	0.241038
OARX_123999513.1	0.239551
OARX_78982967.1	0.239133
OARX_50921852.1	0.239122
OARX_43149441.1	0.239053
OARX_112321655.1	0.238821
OARX_113525578.1	0.237203
OARX_91816958.1	0.236393
OARX_93898942.1	0.23631
OARX_67322374.1	0.235649
s44107.1	0.234579
OARX_79293639.1	0.234336
OARX_108555568.1	0.234317
OARX_125711423_X.1	0.233385
OARX_109443858.1	0.233221
s27905.1	0.231681
OARX_74541037.1	0.230378
OARX_19939180.1	0.229589
OARX_21677876.1	0.228391
OARX_11088122.1	0.227394
OARX_118887238.1	0.226811
OARX_84396258.1	0.225376
OARX_109200876.1	0.224839
OARX_76192158.1	0.224423
s23593.1	0.224257
OARX_108475651.1	0.222812
s34020.1	0.222812
OARX_111306030.1	0.222627
OARX_20950879_X.1	0.22242
OARX_88051650.1	0.221569
OARX_114779008.1	0.221432
OARX_76523631.1	0.221163
s42604.1	0.220901
OARX_109845023.1	0.220345
OARX_90873153.1	0.220154
OARX_14861261.1	0.220089
OARX_77931764.1	0.219356
OARX_114953976.1	0.219228
OARX_102620828.1	0.218966
OARX_83876937.1	0.218881
OARX_10536833.1	0.21754
OARX_112825323.1	0.217036
OARX_122489052.1	0.216913
OARX_38896560_X.1	0.216593
s64579.1	0.215858
s59173.1	0.214657
OARX_15446991.1	0.213832
OARX_30265199.1	0.213341
s15488.1	0.2132
OARX_91430115.1	0.211911
OARX_16568246.1	0.210855
OARX_22360871.1	0.210807
OARX_48493857.1	0.210262
s21022.1	0.210216
OARX_56302763.1	0.209632
OARX_56342973.1	0.209632
OARX_56195013.1	0.209378
s64888.1	0.20927
s19301.1	0.209081
OARX_46406525.1	0.209056
s56097.1	0.208753
OARX_52789083.1	0.208502
s30196.1	0.207575
OARX_54412853.1	0.207481
OARX_115205577.1	0.207414
DU364592_286.1	0.206511
OARX_91240608.1	0.206498
OARX_110869172.1	0.206474
OARX_106780979.1	0.206168
OARX_63114333.1	0.206041
OARX_85664346.1	0.205415
OARX_14749107.1	0.205139
OARX_91326772.1	0.205026
s28984.1	0.203658
s27837.1	0.203649
s40789.1	0.203593
OARX_42401514.1	0.20197
OARX_10840799.1	0.201605
OARX_125632426.1	0.201436
OARX_49045095.1	0.200328
OARX_82418640.1	0.200191
OARX_8203085.1	0.200086
OARX_50862265.1	0.1999
OARX_63240964.1	0.199159
OARX_11393124.1	0.19839
s72944.1	0.198202
OARX_38309659.1	0.198184
OARX_38701147.1	0.198039
OARX_124698743.1	0.197839
OARX_5854800_X.1	0.196723
s73460.1	0.196556
s59821.1	0.195338
s21169.1	0.194583
s44247.1	0.194162
OARX_80520919.1	0.193343
OARX_10767975.1	0.193212
OARX_122258807.1	0.193207
OARX_122134724.1	0.192537
s26116.1	0.192516
OARX_23062957.1	0.192406
OARX_74662147.1	0.192138
OARX_91589178.1	0.191845
s49278.1	0.191684
OAR23_48530053.1	0.190526
OARX_47769058.1	0.190147
OARX_29712188.1	0.189082
OARX_77656772.1	0.188633
OARX_57823297.1	0.188502
OARX_49564109.1	0.188114
OARX_107669130.1	0.187159
s41277.1	0.187068
s45457.1	0.187
OARX_49585624.1	0.186162
OARX_90906078.1	0.185579
OARX_39570821_X.1	0.185491
OARX_65001221.1	0.185364
OARX_29118704.1	0.184726
OARX_51020466.1	0.184294
OARX_86740281.1	0.18419
OARX_28612369.1	0.183862
s39503.1	0.183721
s40966.1	0.182886
s32655.1	0.182751
s36498.1	0.18273
s20869.1	0.181041
OARX_119370187.1	0.180803
OARX_82499695.1	0.180545
s55183.1	0.179004
s09625.1	0.178893
OARX_103524806.1	0.178093
OARX_75975749.1	0.178021
OARX_126267798.1	0.177984
OARX_8997102_X.1	0.177645
s41440.1	0.17751
OARX_128881696.1	0.177444
DU275403_434.1	0.176519
OARX_21374798.1	0.176313
OARX_82254766.1	0.175493
OARX_101475197.1	0.175372
OARX_54104393.1	0.175181
s59443.1	0.174526
OARX_85483846.1	0.174199
OARX_39147901.1	0.174106
s30030.1	0.173347
s54806.1	0.173152
OARX_94549447.1	0.172832
OARX_125130516.1	0.172274
OARX_40322359.1	0.171854
OARX_87273449.1	0.171044
OARX_82456134.1	0.170994
s07406.1	0.170568
s32457.1	0.169023
OARX_81713091.1	0.168646
OARX_11337494.1	0.168271
OARX_124202789.1	0.168182
OARX_15341607.1	0.167397
OARX_74337718.1	0.167123
DU383316_402.1	0.166778
OARX_106445652.1	0.166751
OARX_72948383.1	0.166664
OARX_65809289.1	0.16545
s30633.1	0.165193
OARX_88058957.1	0.165182
OARX_53985636.1	0.164874
OARX_117569024.1	0.164605
OARX_83642813.1	0.164523
OARX_38431131.1	0.164211
OARX_78197954.1	0.164016
OARX_39048356.1	0.163993
OARX_81899362.1	0.163797
OARX_108993743.1	0.163757
OARX_82566242.1	0.163639
OARX_91649730.1	0.163612
OARX_34258733.1	0.163184
s26936.1	0.163092
OARX_122403019.1	0.162994
s59064.1	0.162886
OARX_27524192.1	0.162447
OARX_29249212.1	0.16172
s45757.1	0.161127
s75112.1	0.160973
s69605.1	0.160602
s05480.1	0.160176
OARX_82237539.1	0.159552
OARX_35326302.1	0.159032
OARX_115792016.1	0.158528
s07719.1	0.157645
OARX_35237878.1	0.1567
OARX_120409273.1	0.15659
OARX_31405619.1	0.155393
OARX_43001119.1	0.154129
OARX_48653254.1	0.154083
s50040.1	0.153366
OARX_110276633.1	0.153107
OARX_63276879.1	0.152895
s49888.1	0.152807
OARX_74393538.1	0.151912
OARX_74459953.1	0.15191
OARX_47970634.1	0.151673
OARX_98649121.1	0.151576
s70544.1	0.151375
s52126.1	0.150595
OARX_25481941.1	0.150047
OARX_63571789.1	0.149851
OARX_39416790.1	0.149623
OARX_53225720.1	0.149578
s71449.1	0.149521
OARX_101512543.1	0.148773
OARX_115104454.1	0.147504
OARX_86468715_X.1	0.146428
OARX_31484840.1	0.146415
s44901.1	0.146354
s26041.1	0.14633
OARX_121839918.1	0.146154
OARX_49281832.1	0.145998
s68313.1	0.145951
OARX_114537909_X.1	0.145334
OARX_35497858.1	0.144489
OARX_17003361.1	0.144054
OARX_27398107.1	0.14378
OARX_22199486.1	0.143607
OARX_121227759.1	0.143271
s60331.1	0.143153
OARX_124339688.1	0.142677
OARX_126323247.1	0.142388
s67468.1	0.141553
s50692.1	0.141403
s31917.1	0.140523
s71283.1	0.139707
OARX_38247415.1	0.13936
DU515244_528.1	0.138984
OARX_48110587.1	0.138747
s28386.1	0.138695
OARX_93917601.1	0.138328
OARX_11260093.1	0.137492
s18434.1	0.137458
OARX_86548894.1	0.136843
OARX_19013778.1	0.136706
OARX_121272018.1	0.13655
OARX_121307417.1	0.13655
OARX_23931458.1	0.136201
OARX_74419004.1	0.13605
OARX_10802557.1	0.135413
OARX_107304730.1	0.13506
OARX_47386142_X.1	0.134268
OARX_120155115.1	0.134232
OARX_16099179.1	0.134197
s28564.1	0.134026
OARX_57905305.1	0.13195
s10157.1	0.131698
OARX_108414989.1	0.131476
OARX_129095549.1	0.131216
OARX_51976582.1	0.131133
s71744.1	0.131086
OARX_102128134.1	0.130462
OARX_124453154.1	0.130282
OARX_66060588_X.1	0.130268
OARX_22407231.1	0.130084
s40873.1	0.130084
OARX_62987540.1	0.129813
OARX_75548381.1	0.12981
OARX_91212655.1	0.129179
OARX_47556312.1	0.12842
OARX_51487346.1	0.128347
OARX_123732583.1	0.127741
s02708.1	0.127398
OARX_95550695.1	0.127324
s08251.1	0.127264
OARX_94504309.1	0.125823
OARX_10965528.1	0.125725
OARX_74277156.1	0.125294
s48537.1	0.125165
OARX_108427445.1	0.124462
OARX_84212352_X.1	0.124273
s12053.1	0.124031
OARX_26231414.1	0.123987
OARX_124092052.1	0.123973
OARX_102028326.1	0.123949
s67385.1	0.12393
OARX_64878398.1	0.123929
DU278506_495.1	0.123872
OARX_26968286.1	0.123064
OARX_124055111.1	0.122565
OARX_102373562.1	0.1221
s56930.1	0.121955
s36628.1	0.121833
OARX_22662256.1	0.121768
OARX_77821943.1	0.121443
OARX_97380680.1	0.121229
OARX_43227227.1	0.120172
s50907.1	0.118835
OARX_80565707.1	0.11835
OARX_113174546.1	0.117888
s29291.1	0.117293
s06937.1	0.116968
OARX_107821331.1	0.116081
OARX_110838676.1	0.115585
OARX_42390777.1	0.115504
OARX_73686229.1	0.115334
OARX_46491130.1	0.115266
OARX_94177459_X.1	0.11516
OARX_51960372.1	0.114684
s34139.1	0.114427
OARX_65030113.1	0.114224
OARX_63233390_X.1	0.113873
OARX_45900764.1	0.113322
OARX_107298804.1	0.112871
OARX_52851975.1	0.112664
OARX_80686953.1	0.112548
OARX_126370692.1	0.112376
s22870.1	0.112344
OARX_37504418.1	0.110485
s26134.1	0.110305
OARX_107941501.1	0.110233
OARX_11293420_X.1	0.110064
OARX_38404244.1	0.109982
OARX_62844884.1	0.109703
OARX_33804882.1	0.109039
OARX_39345333.1	0.108459
OARX_63707921.1	0.108363
OARX_23896670.1	0.108316
OARX_53703822.1	0.107786
s45132.1	0.107434
s15257.1	0.107293
s42548.1	0.107156
OARX_46956289.1	0.106766
OARX_19681917.1	0.106232
OARX_111523132.1	0.105422
OARX_42467421.1	0.104862
OARX_25020500.1	0.104608
s17025.1	0.104397
s29064.1	0.104305
OARX_121406229.1	0.104195
OARX_38176998.1	0.104087
OARX_18718383.1	0.103797
OARX_91745643.1	0.103752
OARX_29911993.1	0.10305
OARX_82755160.1	0.102935
OARX_73629464.1	0.10287
OARX_43262963.1	0.102821
OARX_82293389.1	0.102646
OARX_46889291.1	0.101477
OARX_113373957.1	0.101412
OARX_111349974.1	0.100396
OARX_43295474.1	0.0985454
s54281.1	0.0984299
s46983.1	0.0982891
OARX_122339558.1	0.0980405
OARX_120998827.1	0.0975604
OARX_86633094.1	0.0973334
OARX_31437911.1	0.0972973
s66286.1	0.0967292
s09163.1	0.0962154
s51149.1	0.096147
OARX_82205212.1	0.096039
s71214.1	0.0958397
OARX_107637867.1	0.0957335
OARX_11175000.1	0.0948935
OARX_46749492.1	0.0947516
OARX_25296412.1	0.0942134
OARX_114161048.1	0.0931103
s36336.1	0.0926297
s46003.1	0.0924111
OARX_40911514.1	0.0921476
OARX_120893024.1	0.0906292
OARX_40803822.1	0.0905932
s71112.1	0.0905256
OARX_46542447.1	0.0903245
OARX_91172883.1	0.0901467
DU322639_600.1	0.0900391
OARX_38618108.1	0.0893081
OARX_40933614.1	0.0890838
s14505.1	0.0880868
OARX_79448969.1	0.0870147
OARX_81842153.1	0.0864472
s63659.1	0.0863725
OARX_120373463.1	0.0857939
OARX_124402618.1	0.085685
OARX_85511821.1	0.0854714
OARX_29226488.1	0.0852867
OARX_34048710.1	0.0849236
s43107.1	0.0848893
s06926.1	0.0845438
OARX_84338138.1	0.0845426
DU179310_361.1	0.0845179
s47155.1	0.0844422
OARX_119235356.1	0.0843471
OARX_76432979.1	0.0840872
s19302.1	0.0840864
s10893.1	0.0840155
OARX_74923472.1	0.08355
OARX_25153821.1	0.0828357
DU330424_111.1	0.0827297
OARX_94234233.1	0.0825011
s66303.1	0.0819406
OARX_29948603.1	0.0813254
OARX_39956656.1	0.0810311
OARX_78740611.1	0.0810305
OARX_125571053.1	0.0808401
OARX_55032299.1	0.0801399
OARX_121157013.1	0.0799815
OARX_81857193.1	0.0798033
s35782.1	0.0796182
OARX_94349054.1	0.0794423
OARX_121608149.1	0.0794267
OARX_114431127.1	0.0793083
OARX_8338946.1	0.0792851
OARX_107723746.1	0.0789985
OARX_35208552.1	0.0788193
OARX_114576371.1	0.0786505
OARX_83698455.1	0.0782219
OARX_94072480.1	0.0780821
s58522.1	0.0777629
s38658.1	0.0775363
OARX_119423593.1	0.0773343
OARX_73014623.1	0.0770953
OARX_73028561.1	0.0770953
s07963.1	0.077007
OARX_112600953.1	0.0768446
s21669.1	0.0763691
OARX_76572936.1	0.0761807
s70693.1	0.0745384
OARX_16784151.1	0.0744359
OARX_91845722.1	0.0741785
OARX_108893660.1	0.0739846
OARX_78232119.1	0.0738795
OARX_42837583.1	0.0737139
OARX_101340408.1	0.0727842
s47245.1	0.0722927
OARX_14057975.1	0.0719296
OARX_28451043_X.1	0.0716149
OARX_91962703.1	0.0716005
s07429.1	0.0713397
OARX_110992791.1	0.0710536
s70954.1	0.0709937
OARX_120658270.1	0.0708261
OARX_111110978.1	0.0706415
OARX_39409681.1	0.0699371
OARX_38777888.1	0.0692998
OARX_17042330.1	0.0690061
OARX_74828607.1	0.068998
OARX_119510626.1	0.0687751
s17709.1	0.0686354
OARX_87726916.1	0.0686106
OARX_105818480.1	0.0685634
s54349.1	0.0684337
OARX_38801624.1	0.0683806
OARX_61843689.1	0.0683557
OARX_33986060.1	0.0682013
OARX_15909775.1	0.0679683
OARX_119727383.1	0.0677069
OARX_48063847.1	0.0675475
s56175.1	0.0669884
OARX_104262179.1	0.0668058
s25630.1	0.0666052
s61416.1	0.0660744
OARX_14382090.1	0.0654952
s29524.1	0.0649346
OARX_29022612.1	0.0649288
s13231.1	0.0648976
OARX_89022750.1	0.0645057
OARX_33843032.1	0.0642928
OARX_47341177.1	0.0642322
OARX_13949178.1	0.0642263
OARX_47429385.1	0.0640235
OARX_115405200.1	0.0638316
s17286.1	0.0638021
OARX_30385723.1	0.0637946
s11827.1	0.0636088
OARX_110594072.1	0.0635676
s22678.1	0.0623151
OARX_25197033.1	0.0617058
OARX_78584539.1	0.061527
s62101.1	0.0612797
DU450886_629.1	0.06126
OARX_79396841.1	0.0609425
OARX_93669308.1	0.0607613
OARX_42803740.1	0.0606178
OARX_56169434_X.1	0.060608
s38969.1	0.060608
OARX_27143958.1	0.0604318
OARX_48392113.1	0.0602328
s63644.1	0.0602299
OARX_37969851.1	0.059885
OARX_111907035.1	0.0595441
OARX_125655143.1	0.0588881
s47417.1	0.0587807
OARX_30148765.1	0.0587472
OARX_42299151.1	0.0585833
OARX_98701611.1	0.058387
OARX_79350656.1	0.0583119
OARX_122314303.1	0.0582146
s21099.1	0.057844
OARX_121352349_X.1	0.0575278
s54765.1	0.0574734
DU240765_244.1	0.0569619
OARX_78380875.1	0.0567487
OARX_11233802.1	0.0567056
OARX_97512438.1	0.0566152
OARX_125616534.1	0.0564576
s12123.1	0.0563726
s05978.1	0.0561663
OARX_53932317.1	0.0561606
OARX_39685931.1	0.0557834
OARX_24311503.1	0.0555744
OARX_38965990.1	0.0550647
OARX_121716434.1	0.0546798
s02621.1	0.0543656
OARX_25473829.1	0.0542009
s30825.1	0.0540536
OARX_85579388.1	0.0539451
s51167.1	0.0536998
OARX_15615564.1	0.0536304
OARX_124733388.1	0.0531775
OARX_85386153.1	0.0529804
OARX_99182568.1	0.0528734
OARX_82902165.1	0.0528446
OARX_25389769.1	0.0524396
OARX_93384200.1	0.0523328
OARX_39212838.1	0.0521991
OARX_114693376.1	0.0514001
OARX_115528761.1	0.0512235
OARX_81807292.1	0.0510596
OARX_121076593.1	0.0503226
OARX_8095004.1	0.0500925
OARX_110234399.1	0.0499451
s11286.1	0.0497084
OARX_128945275.1	0.0496297
OARX_118770487.1	0.049569
OARX_88140694.1	0.0494245
OARX_112805650.1	0.0492255
OARX_120191387.1	0.0490016
OARX_38023667.1	0.0488106
OARX_101233724.1	0.0486959
OARX_28932453.1	0.0485403
OARX_19780103.1	0.0479086
OARX_40710286.1	0.0476134
OARX_40121539.1	0.0473901
OARX_97352456.1	0.0473371
OARX_38201398.1	0.0466273
s24801.1	0.0463948
OARX_38346902.1	0.0463335
OARX_78504400.1	0.046086
s65847.1	0.0458931
OARX_87619694.1	0.0446567
OARX_67423871.1	0.0446229
OARX_77758767.1	0.0443128
OARX_124895181.1	0.0438103
OARX_115080641.1	0.0435941
OARX_115093283.1	0.0435941
OARX_14104070.1	0.043399
OARX_114129627_X.1	0.0431285
s21331.1	0.0430325
OARX_22733191.1	0.0429955
OARX_78696595.1	0.0429064
OARX_26259689.1	0.0426014
OARX_14822231.1	0.0425702
OARX_86997550.1	0.042486
OARX_25431652.1	0.0423569
s10353.1	0.0423511
OARX_107094834.1	0.0422521
s13796.1	0.0420139
OARX_111424482.1	0.0418721
OARX_107840506.1	0.0415121
OARX_78089621.1	0.0411058
OARX_113078192.1	0.0408142
OARX_15558300.1	0.0407816
s42190.1	0.0407705
s43991.1	0.0405337
s74614.1	0.0403953
s17179.1	0.0402297
OARX_110496762.1	0.0402125
OARX_120706037.1	0.0401401
OARX_119825699_X.1	0.0399905
OARX_82005367.1	0.0397762
OARX_83773452.1	0.0393954
OARX_11703218.1	0.0389002
OARX_82849213.1	0.0387959
OARX_114489693.1	0.0387357
OARX_111575175.1	0.0387133
OARX_16640246.1	0.0386211
DU199514_430.1	0.0385484
OARX_82943742.1	0.0384548
s53551.1	0.0383201
OARX_109082678_X.1	0.038017
OARX_102920566.1	0.0378899
OARX_48374568.1	0.0375694
OARX_27060628.1	0.0375294
s71305.1	0.0375237
s66300.1	0.0375097
OARX_49135019.1	0.0373958
OARX_106495830.1	0.0372007
OARX_116844747.1	0.0371594
OARX_55773697.1	0.0370644
OARX_102234369.1	0.0367277
OARX_94104793.1	0.0365926
OARX_125057668.1	0.0363987
OARX_125044988.1	0.0363987
OARX_125031440.1	0.0363987
OARX_84110445.1	0.0363715
DU225785_452.1	0.0360689
OARX_31537208.1	0.0359429
OARX_124587487.1	0.0358323
OARX_119308133.1	0.0358197
OARX_108932732.1	0.0358102
OARX_78035854.1	0.0354293
OARX_22620616.1	0.0349844
OARX_117790873.1	0.034981
OARX_19024316.1	0.0346945
OARX_114499659.1	0.034485
OARX_32005669.1	0.0343149
OARX_115311000.1	0.0341673
OARX_34104748.1	0.0341507
OARX_31943721.1	0.0326292
OARX_111190102.1	0.0321999
OARX_43377931.1	0.0318
OARX_119492809.1	0.0314041
s03197.1	0.0311907
OARX_24888669.1	0.0307692
OARX_16603478.1	0.030442
OARX_110941776.1	0.0303531
OARX_94139261.1	0.0302589
OARX_19806337.1	0.0302585
OARX_11374295.1	0.0301269
OARX_88907191.1	0.0299073
s24321.1	0.0297875
OARX_18967005.1	0.0296255
OARX_109545230.1	0.0290154
s20460.1	0.0289345
OARX_115157818.1	0.0283854
OARX_107058174.1	0.0275591
s22753.1	0.0274571
s12092.1	0.0273065
s38327.1	0.0272764
s29067.1	0.0263876
s31310.1	0.0259942
s44214.1	0.0259787
s61624.1	0.0256699
OARX_27576676.1	0.0256524
s12865.1	0.0255103
OARX_91551152.1	0.0252482
OARX_83760443.1	0.0244653
OARX_78415093.1	0.0239814
OARX_78152672.1	0.0235017
OARX_115767547.1	0.0234849
OARX_11668696.1	0.0233497
OARX_105905765.1	0.023227
s62013.1	0.0231095
OARX_59257971.1	0.0228354
OARX_46123631.1	0.0228065
OARX_87598993.1	0.0226535
s01703.1	0.0226441
OARX_110792720.1	0.0224811
OARX_124978161.1	0.0223554
s33439.1	0.0222211
s43859.1	0.0221778
OARX_39901562.1	0.0221011
OARX_26219241.1	0.021802
250506CS3900539000001_471.1	0.0217529
OARX_126406510.1	0.0214122
s43972.1	0.02133
OARX_27076240.1	0.0211854
OARX_118061045.1	0.0209764
OARX_26091319.1	0.020836
s01718.1	0.0203657
OARX_108855097.1	0.020296
OARX_7962626.1	0.0201661
s48622.1	0.0200789
OARX_14214233.1	0.0198605
OARX_114805072.1	0.0197573
OARX_124785484.1	0.0195201
s18515.1	0.0193883
OARX_29188769.1	0.0193843
OARX_14876499.1	0.0192304
OARX_88646756.1	0.0191177
OARX_119932740_X.1	0.0187979
OARX_102576796.1	0.0187181
OARX_84464739.1	0.0186457
OARX_26036045.1	0.0186406
OARX_19707716.1	0.0181386
OARX_31599682.1	0.018057
OARX_103197673.1	0.0180562
OARX_18218115.1	0.0177242
s23827.1	0.0177235
OARX_100307878.1	0.0175338
s64293.1	0.0173965
s42467.1	0.0169371
s00084.1	0.0168104
OARX_92007136.1	0.0165457
OARX_111462941.1	0.0164777
OARX_120910363.1	0.0157397
OARX_40013563.1	0.0157099
OARX_109487401.1	0.0154458
OARX_8657405_X.1	0.015303
s21042.1	0.0145624
OARX_78222056.1	0.0144507
OARX_8948859.1	0.0143603
OARX_78028955.1	0.0141546
OARX_78959608.1	0.0141079
OARX_58621412.1	0.0140105
OARX_94381187.1	0.0137059
OARX_124847482.1	0.0134734
s61888.1	0.0130799
s51129.1	0.0129114
OARX_82628483.1	0.012234
s32665.1	0.0122303
OARX_52608221.1	0.011946
OARX_31883742.1	0.0117577
OARX_46572093.1	0.0114977
OARX_88665373.1	0.0114107
OARX_88266152.1	0.011367
OARX_121809968.1	0.0111309
OARX_82679761.1	0.0109035
OARX_25160755.1	0.0108641
DU435115_188.1	0.0105682
s17468.1	0.0105195
OARX_64628601.1	0.00963397
OARX_113035178.1	0.00949089
OARX_88695514.1	0.00947041
s61601.1	0.00927816
s69242.1	0.00927449
OARX_86280642.1	0.00925067
OARX_120573426.1	0.0092436
s38854.1	0.00923757
OARX_126170081.1	0.0090896
OARX_85406306.1	0.00906886
OARX_40368091.1	0.0084861
OARX_46842427.1	0.00844193
OARX_104301327.1	0.00812116
OARX_30541022_X.1	0.00796884
OARX_59571364.1	0.00780319
s05185.1	0.00778484
s72924.1	0.00777675
OARX_121097572.1	0.00757411
OARX_88214758.1	0.0071201
OARX_97709391.1	0.00705249
OARX_97737734.1	0.00705249
OARX_108776576.1	0.00676095
OARX_108789735.1	0.00676095
s16893.1	0.00649248
OARX_129007775.1	0.0064557
OARX_110420444_X.1	0.00635175
s05550.1	0.00631927
OARX_8267269.1	0.00625756
OARX_88410255.1	0.00614179
s38753.1	0.00611538
OARX_27752501.1	0.00602272
OARX_111386041.1	0.0057168
s11037.1	0.00569856
OARX_50965739.1	0.00562707
s06378.1	0.00502947
OARX_114352662.1	0.00484396
s49643.1	0.00476972
OARX_21851884.1	0.00473297
OARX_21869827.1	0.00473297
OARX_119953271.1	0.00451275
OARX_42340942.1	0.0044421
OARX_30312445.1	0.00336698
OARX_128836973.1	0.00332764
s40094.1	0.00331855
s64012.1	0.00328913
s41047.1	0.00294414
OARX_32010983.1	0.00294345
OARX_8907381.1	0.00292337
OARX_14396780.1	0.00272422
OARX_84431875.1	0.00262744
s41698.1	0.00246759
s57129.1	0.00246619
OARX_46551013.1	0.00240887
OARX_31810590.1	0.00212288
OARX_28862933.1	0.00205291
OARX_40762309.1	0.00197784
DU276270_427.1	0.00155951
OARX_109922971.1	0.00149447
OARX_112854991_X.1	0.00108426
s59231.1	0.000989089
OARX_104101047.1	0.000795476
OARX_30397866.1	0.000627612
s74637.1	0.000528325
OARX_81029058.1	0.000332651
s29953.1	-6.09e-05
OARX_10602383.1	-0.000103267
s29254.1	-0.000229282
s50055.1	-0.000439793
OARX_40992335.1	-0.000657282
OARX_82650389.1	-0.000984579
OARX_102187315.1	-0.00106557
OARX_38363560.1	-0.00137297
OARX_124970841.1	-0.00175973
s22414.1	-0.00196709
s38728.1	-0.00225174
s53196.1	-0.00247708
OARX_123983913.1	-0.00250624
OARX_121995198.1	-0.0026355
OARX_29830880.1	-0.00292737
OARX_38528597.1	-0.00295836
s05401.1	-0.00310701
OARX_109619990.1	-0.00325567
OARX_122571365.1	-0.0036211
s23119.1	-0.00367996
OARX_120478341.1	-0.00412409
OARX_48941479.1	-0.0041395
s33015.1	-0.00415344
OARX_31838440.1	-0.00421461
s09170.1	-0.00436634
s72987.1	-0.00448423
OARX_123908719.1	-0.00456924
s19711.1	-0.00459966
OARX_25892929.1	-0.00462
OARX_81017616.1	-0.00480892
OARX_120110524.1	-0.00489444
OARX_87841793.1	-0.00502206
OARX_113214394.1	-0.00531343
OARX_46276607.1	-0.00533625
OARX_65208811.1	-0.00569249
s48591.1	-0.00574674
s03694.1	-0.00635043
OARX_27593383_X.1	-0.00641869
OARX_86777929.1	-0.00670463
OARX_14669588.1	-0.00692094
OARX_82373498.1	-0.007041
s15738.1	-0.00706163
OARX_28418646_X.1	-0.00741036
OARX_26418059.1	-0.0077685
OARX_113305737.1	-0.00788174
s63588.1	-0.00798521
OARX_118162943.1	-0.00818783
OARX_45655473.1	-0.00828018
s09194.1	-0.00855996
OARX_25614788.1	-0.00861474
OARX_40028377.1	-0.00919566
s47072.1	-0.00945266
OARX_116055833.1	-0.009637
OARX_93308477.1	-0.00976753
s74057.1	-0.00999795
OARX_57792792.1	-0.0101012
s44053.1	-0.0103301
s15143.1	-0.0104972
s32042.1	-0.0109309
s15552.1	-0.0114424
DU487488_662.1	-0.0114626
OARX_34195379.1	-0.0116409
OARX_14005468.1	-0.0117563
DU428697_498.1	-0.0119062
OARX_42676383.1	-0.0120639
OARX_85734914.1	-0.0121279
